# Supplementary material
Source: MDPI journal article supplement (https://www.mdpi.com/1424-8247/17/5/650)
Supplement: s1 [file s1]

# New thiazolidine-4-one derivatives as SARS-CoV-2 main protease inhibitors

Antonella Messori <sup>1,†</sup>, Paolo Malune <sup>2</sup>, Elisa Patacchini <sup>1,†</sup>, Valentina Noemi Madia <sup>1,\*</sup>, Davide Ialongo <sup>1</sup>, Merve Arpacioğlu <sup>1</sup>, Aurora Albano <sup>1</sup>, Giuseppe Ruggieri <sup>1</sup>, Francesco Saccoliti <sup>1</sup>, Luigi Scipione <sup>1</sup>, Enzo Tramontano <sup>2</sup>, Serena Canton <sup>2</sup>, Angela Corona <sup>2</sup>, Sante Scognamiglio <sup>2</sup>, Annalaura Paulis <sup>2</sup>, Mustapha Suleiman <sup>3</sup>, Helmi Mohammed Al-Maqtari <sup>4</sup>, Fatma Mohamed A. Abid <sup>5</sup>, Sarkar M.A. Kawsar <sup>6</sup>, Murugesan Sankaranarayanan <sup>7</sup>, Roberto Di Santo <sup>1</sup>, Francesca Esposito <sup>2,\*</sup> and Roberta Costi <sup>1</sup>

<sup>1</sup> Istituto Pasteur-Fondazione Cenci Bolognetti, Dipartimento di Chimica e Tecnologie del Farmaco, "Sapienza" Università di Roma, p.le Aldo Moro 5, I-00185 Rome, Italy; antonella.messori@uniroma1.it (A.M.); elisa.patacchini@uniroma1.it (E.P.); valentinanoemi.madia@uniroma1.it (V.N.M.); davide.ialongo@uniroma1.it (D.I.); merve.arpacioglu@uniroma1.it (M.A.); aurora.albano@uniroma1.it (A.A.); giuseppe.ruggieri@uniroma1.it (G.R.); francesco.saccoliti90@gmail.com (F.S.); luigi.scipione@uniroma1.it (L.S.); roberto.disanto@uniroma1.it (R.D.S.); roberta.costi@uniroma1.it (R.C.).

<sup>2</sup> Department of Life and Environmental Sciences, Faculty of Biology and Pharmacy, University of Cagliari, Cittadella Universitaria di Monserrato, ss554 Km 4500, 09045 Monserrato, Cagliari, Italy; paolo.malune@unica.it; (P.M.); tramon@unica.it (E.T.); serena3canton@gmail.com (S.C.); sante.scognamiglio@unica.it (S.S.); angela.corona@unica.it (A.C.); annalaurapaulis@unica.it (A.P.); francescaesposito@unica.it (F.E.).

<sup>3</sup> Department of Chemistry, Sokoto State University, Sokoto, 852101, Nigeria; masge007@gmail.com (Mus.S.)

<sup>4</sup> Department of Chemistry, College of Education, Hodeidah University, Hodeidah, 207416, Yemen; helmi2007m@yahoo.com (H.M.A.M.)

<sup>5</sup> Department of Chemistry, Faculty of Science, Al-Azzaytuna University, Tarhuna, 537622224, Libya; fatma\_abeed@yahoo.com (F.M.A.A.)

<sup>6</sup> Laboratory of Carbohydrate and Nucleoside Chemistry, Department of Chemistry, University of Chittagong, Chittagong 4331, Bangladesh; akawsar@cu.ac.bd (S.M.A.K.)

<sup>7</sup> Medicinal Chemistry Research Laboratory, Birla Institute of Technology and Science Pilani, Pilani Campus, Pilani 333031, Rajasthan, India; murugesan@pilani.bits-pilani.ac.in (Mur.S.)

<sup>†</sup> These authors contributed equally to this work.

<sup>\*</sup> Correspondence: valentinanoemi.madia@uniroma1.it, Tel.: +39-06-4991-3965 (V.N.M.); francescaesposito@unica.it, Tel.: +39- 070-6754533 (F.E.).

## Contents

Figure S1: FTIR Spectrum for compound **4a**;

Figure S2: <sup>1</sup>H NMR Spectrum for compound **4a**;

Figure S3: <sup>13</sup>C NMR Spectrum for compound **4a**;

Figure S4: FTIR Spectrum for compound **4b**;

Figure S5: <sup>1</sup>H NMR Spectrum for compound **4b**

Figure S6: <sup>13</sup>C NMR Spectrum for compound **4b**;

Figure S7: FTIR Spectrum for compound **4c**;

Figure S8: <sup>1</sup>H NMR Spectrum for compound **4c**;

Figure S9: <sup>13</sup>C NMR Spectrum for compound **4c**;

Figure S10: FTIR Spectrum for compound **4d**;

Figure S11:  $^1\text{H}$  NMR Spectrum for compound **4d**;

Figure S12:  $^{13}\text{C}$  NMR Spectrum for compound **4d**;

Figure S13: FTIR Spectrum for compound **4e**;

Figure S14:  $^1\text{H}$  NMR Spectrum for compound **4e**;

Figure S15:  $^{13}\text{C}$  NMR Spectrum for compound **4e**;

Figure S16: FTIR Spectrum for compound **4f**;

Figure S17:  $^1\text{H}$  NMR Spectrum for compound **4f**;

Figure S18:  $^{13}\text{C}$  NMR Spectrum for compound **4f**;

Figure S19: FTIR Spectrum for compound **4g**;

Figure S20:  $^1\text{H}$  NMR Spectrum for compound **4g**;

Figure S21:  $^{13}\text{C}$  NMR Spectrum for compound **4g**;

Figure S22: FTIR Spectrum for compound **4h**;

Figure S23:  $^1\text{H}$  NMR Spectrum for compound **4h**;

Figure S24:  $^{13}\text{C}$  NMR Spectrum for compound **4h**;

Figure S25: FTIR Spectrum for compound **4i**;

Figure S26:  $^1\text{H}$  NMR Spectrum for compound **4i**;

Figure S27:  $^{13}\text{C}$  NMR Spectrum for compound **4i**;

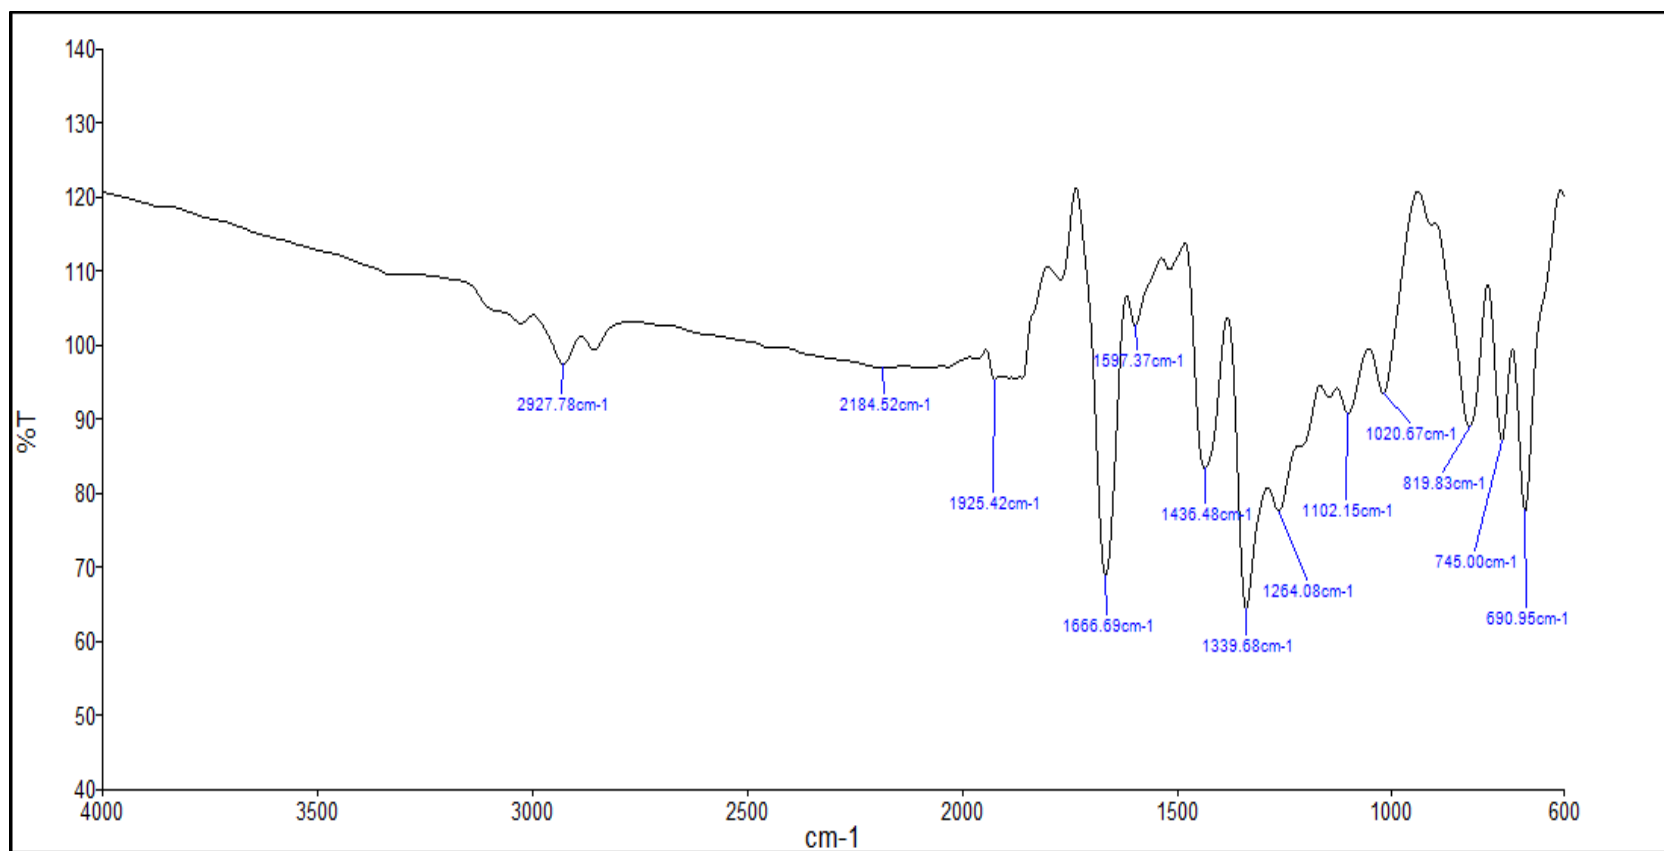

Figure S1. FTIR Spectrum for compound **4a**

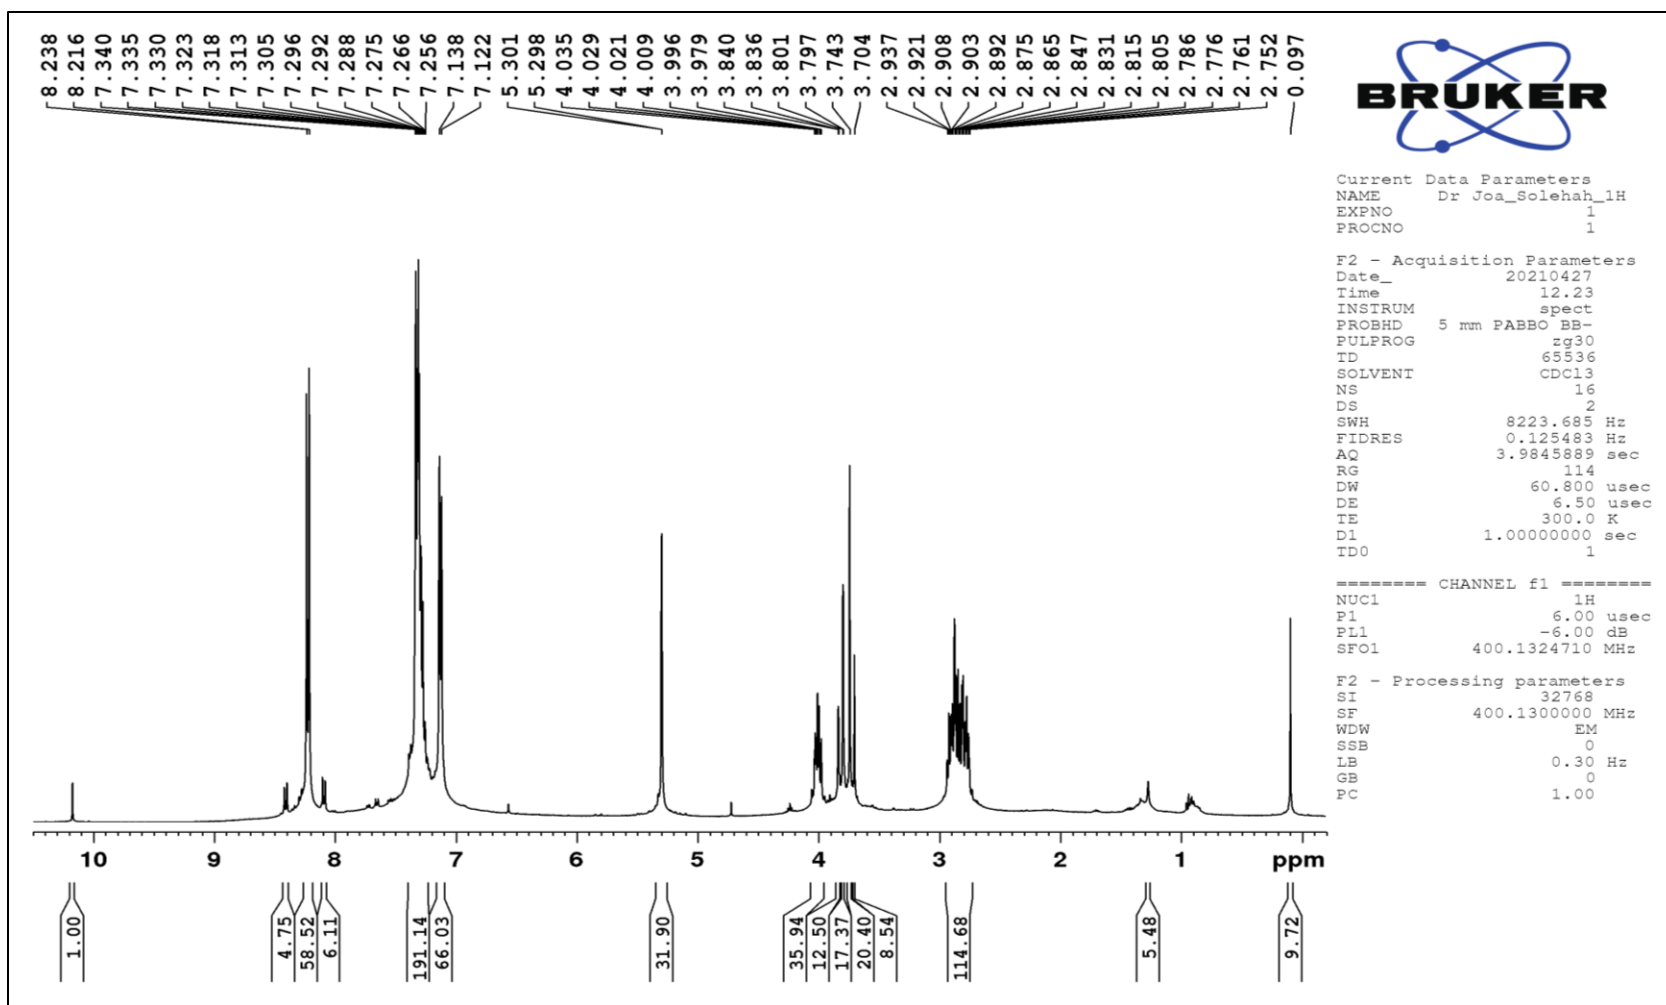

Figure S2.  $^1\text{H}$  NMR Spectrum for compound **4a**

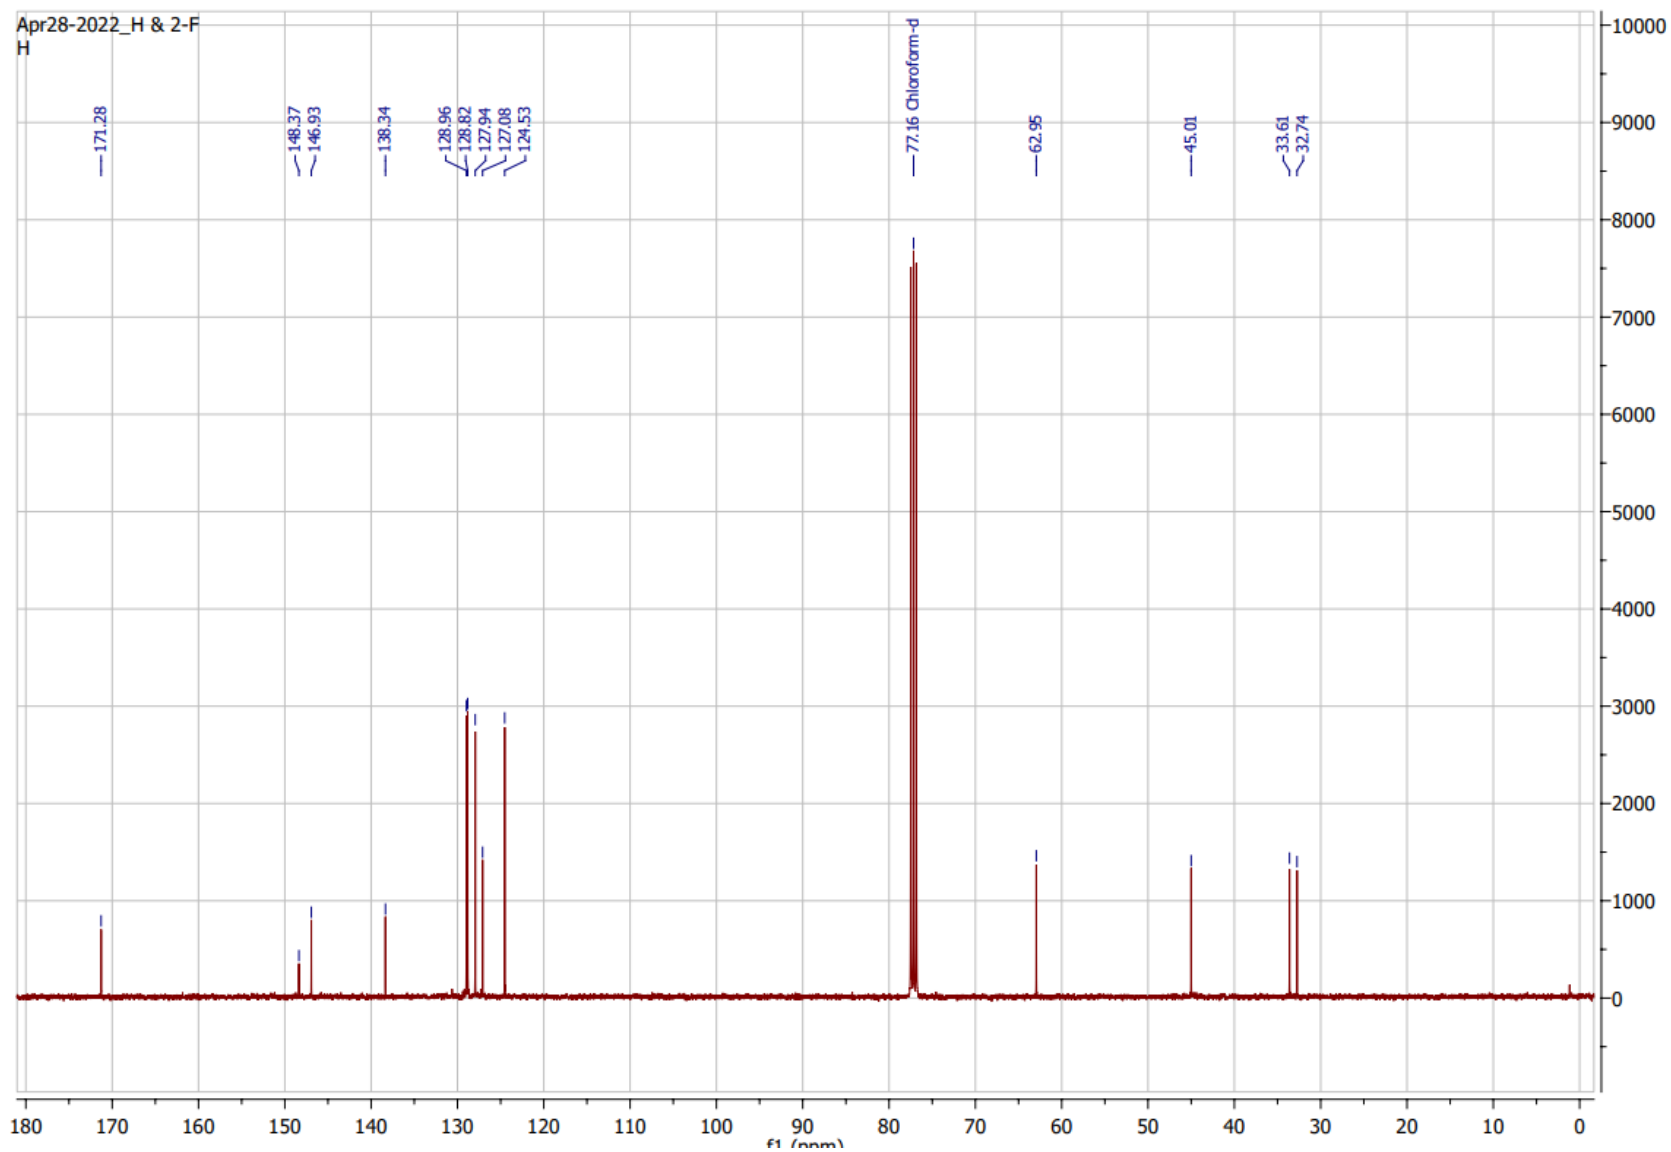

Figure S3.  $^{13}\text{C}$  NMR Spectrum for compound 4a

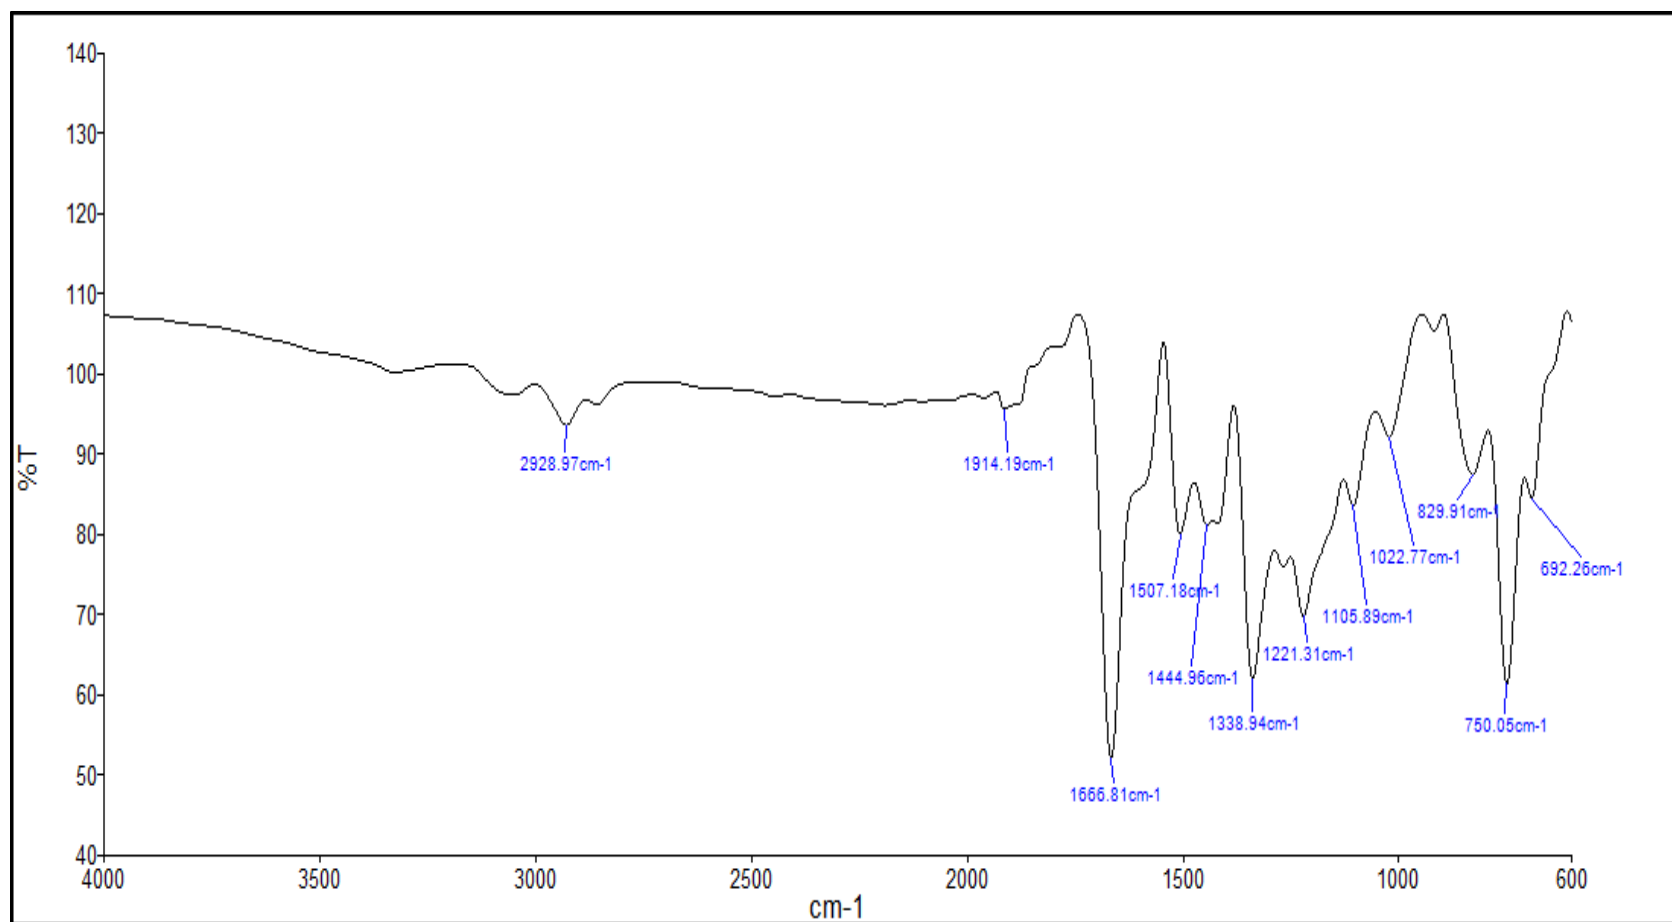

Figure S4. FTIR Spectrum for compound **4b**

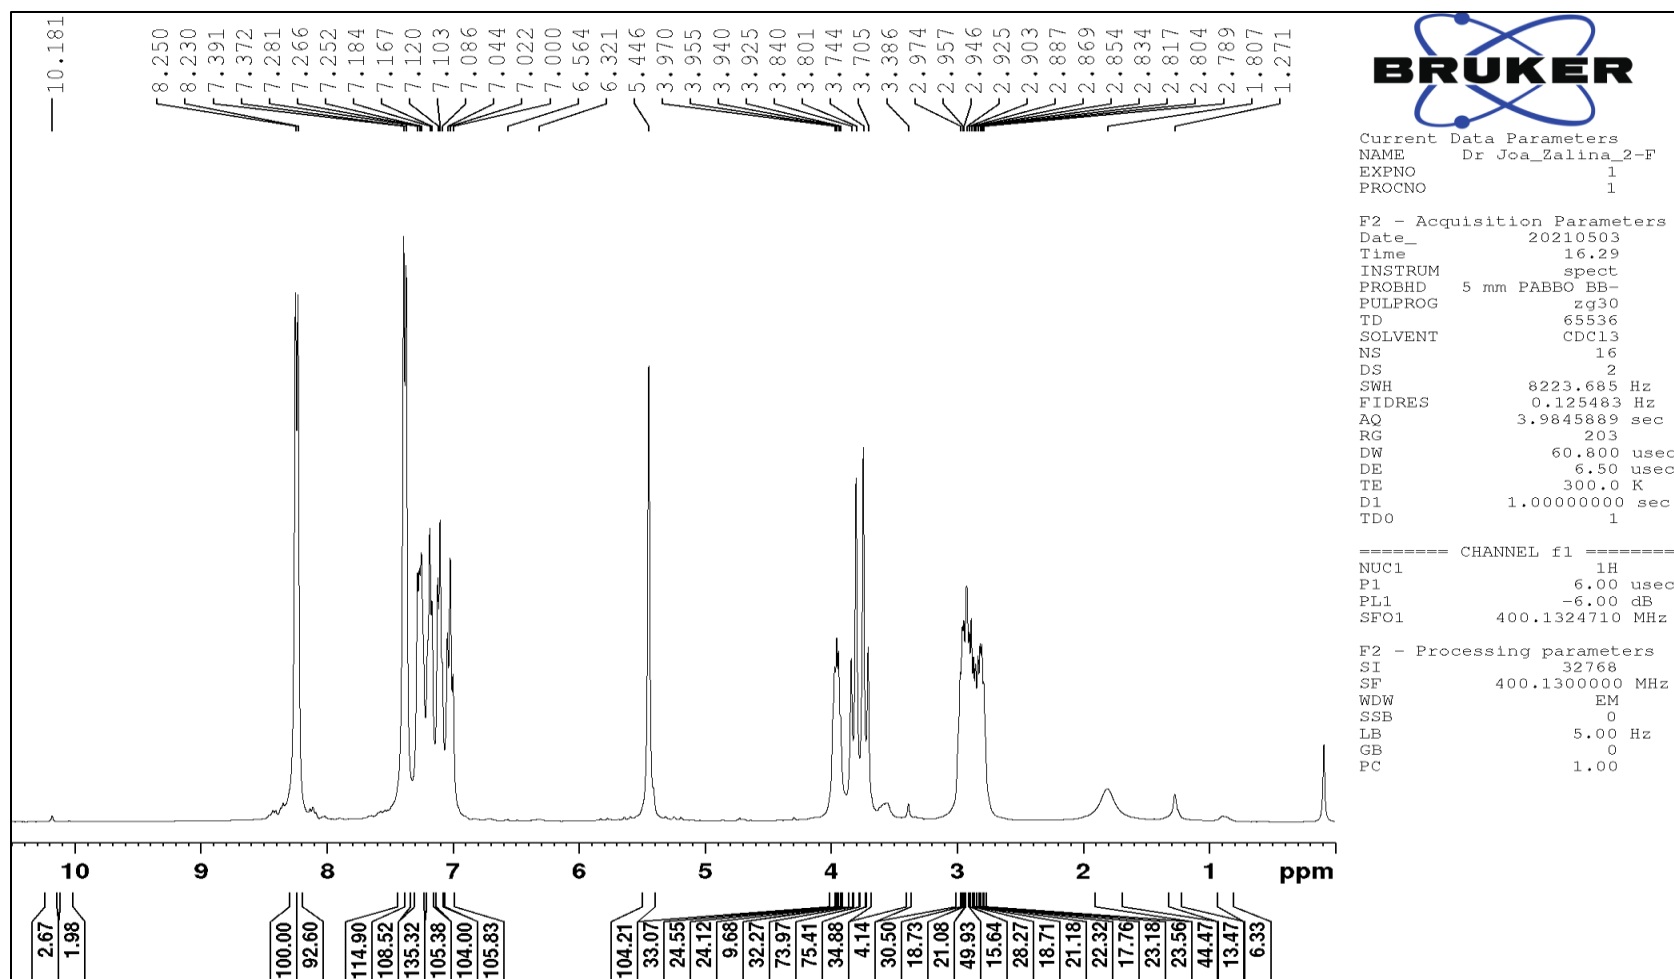

Figure S5. <sup>1</sup>H NMR Spectrum for compound **4b**

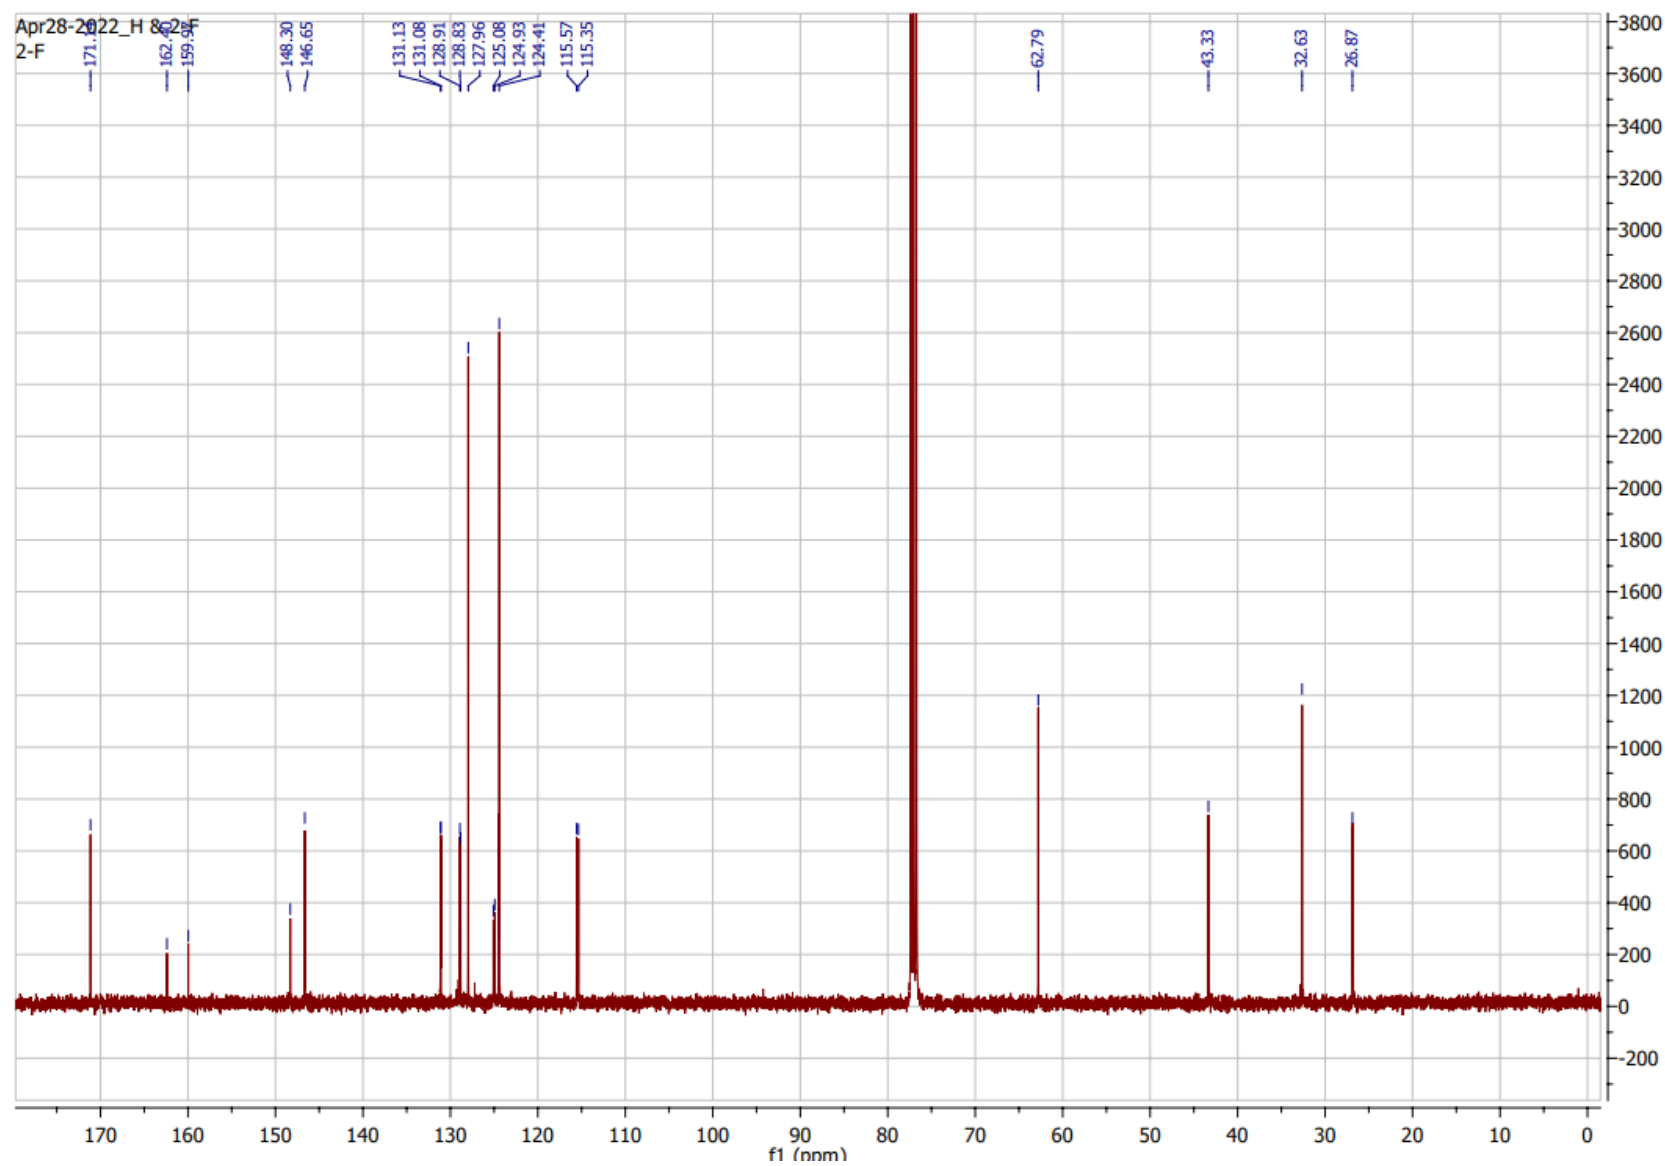

Figure S6.  $^{13}\text{C}$  NMR Spectrum for compound **4b**



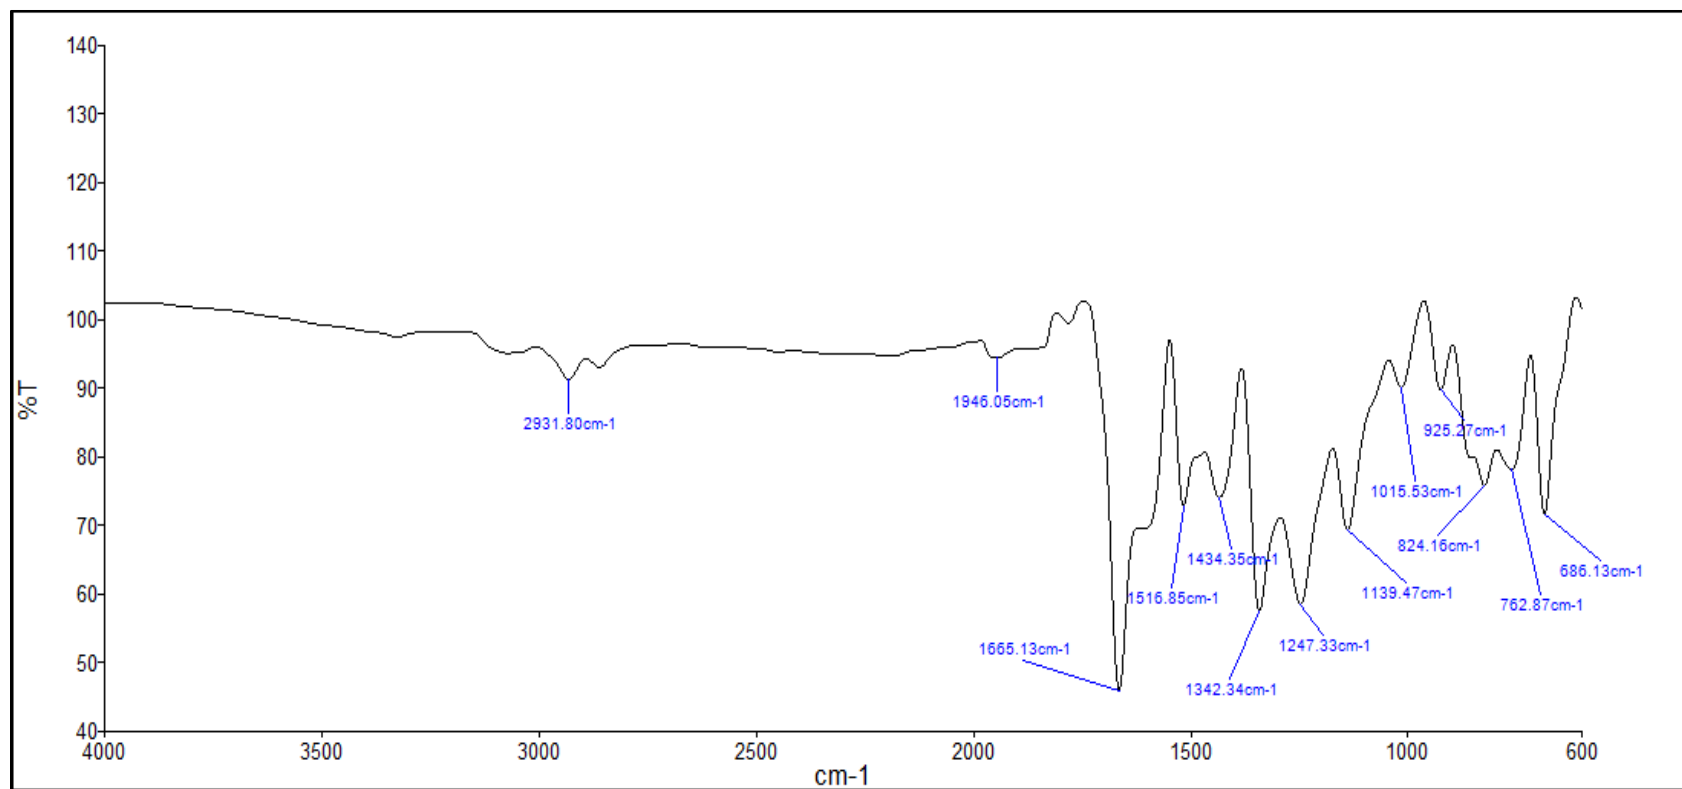

Figure S7. FTIR Spectrum for compound **4c**

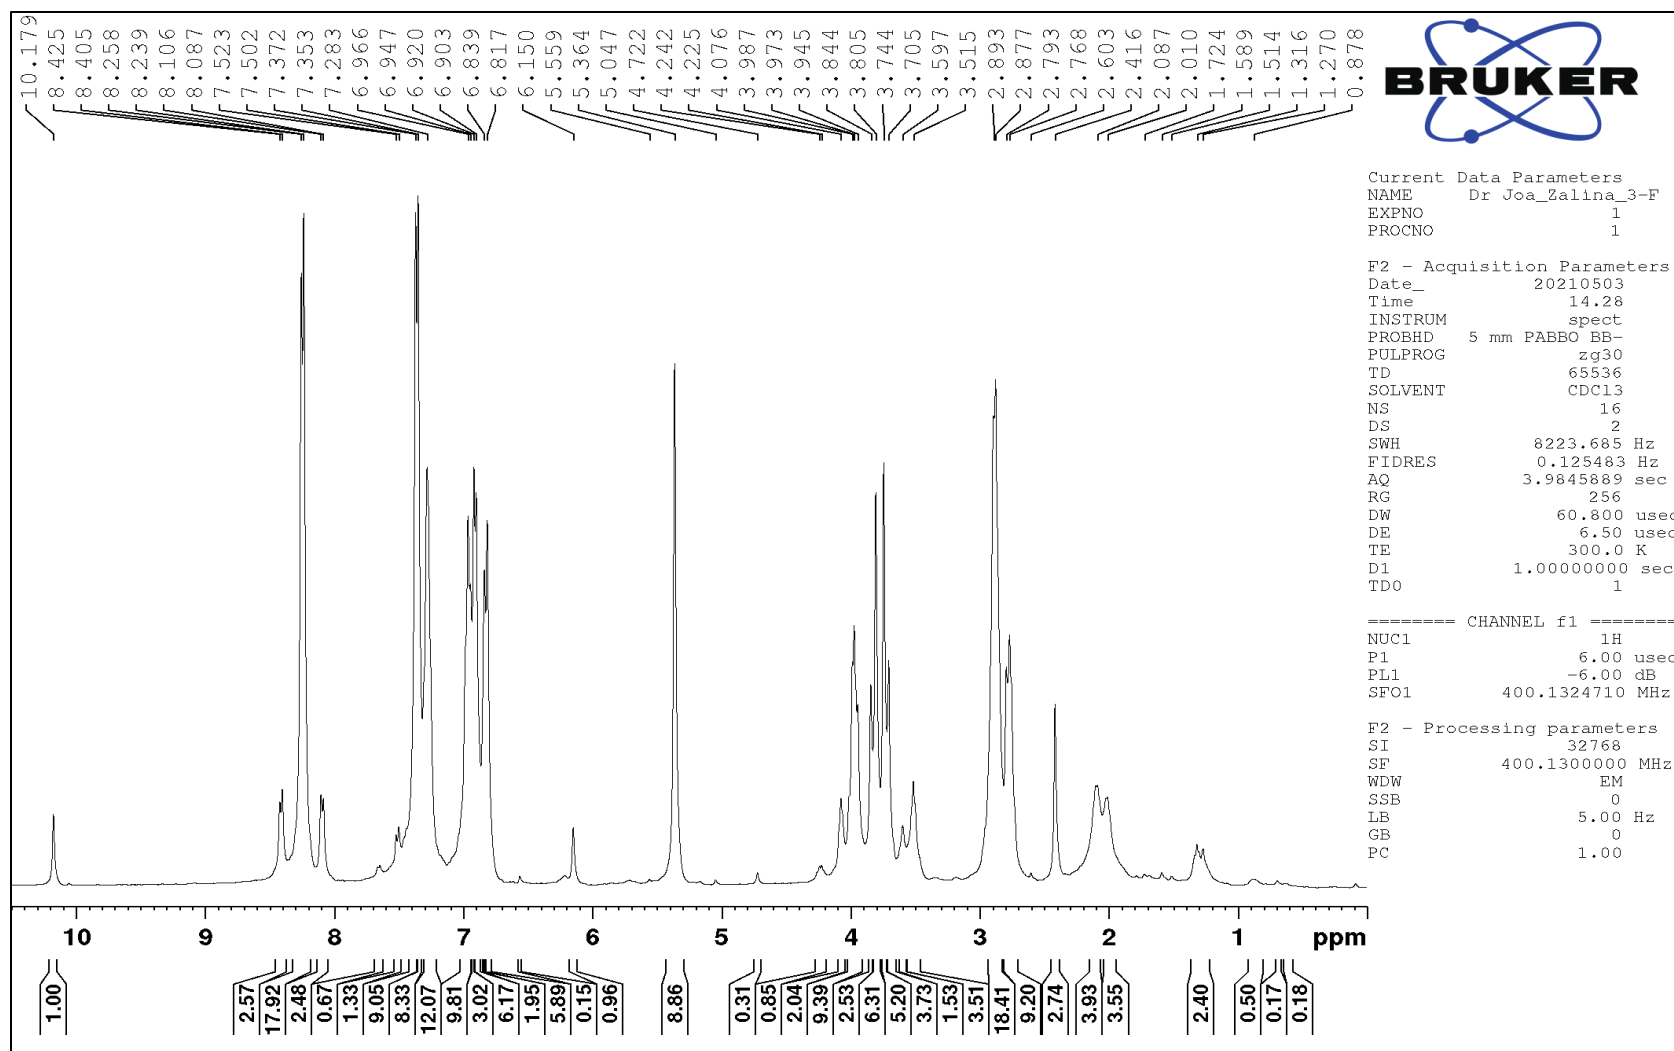

Figure S8. <sup>1</sup>H NMR Spectrum for compound **4c**

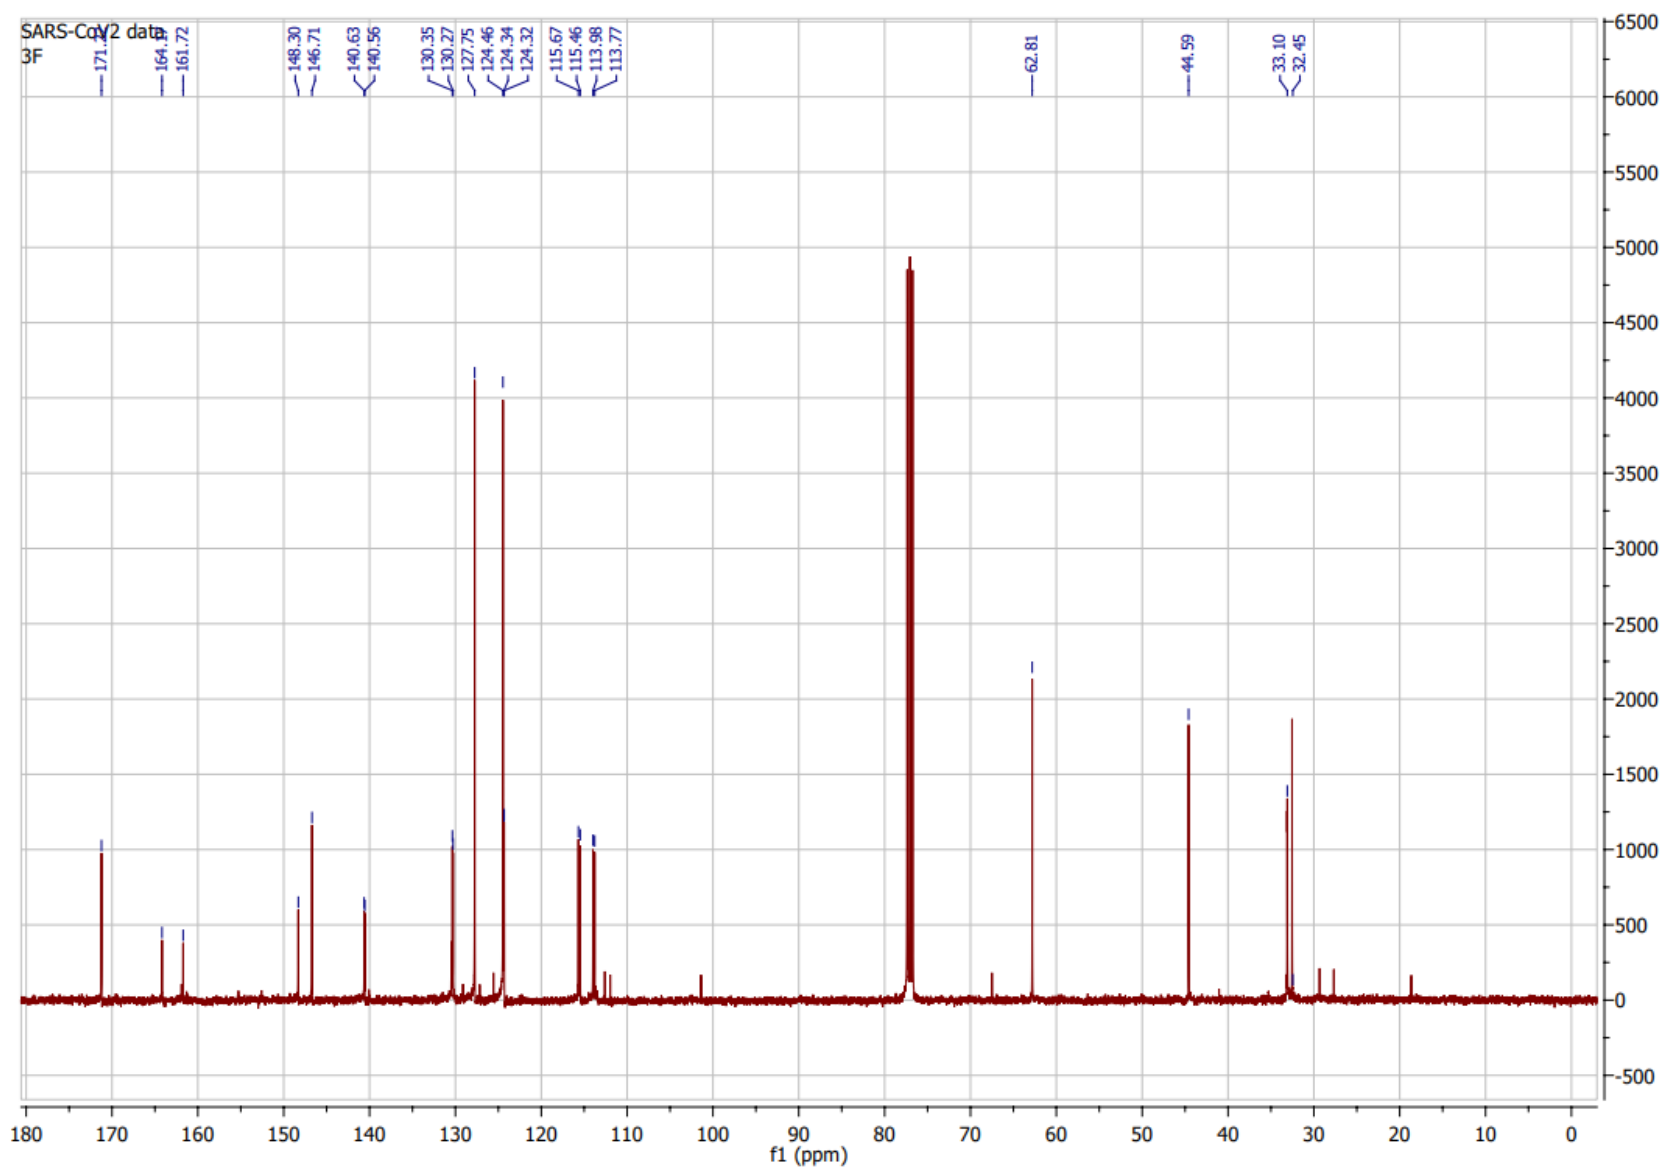

Figure S9.  $^{13}\text{C}$  NMR Spectrum for compound **4c**

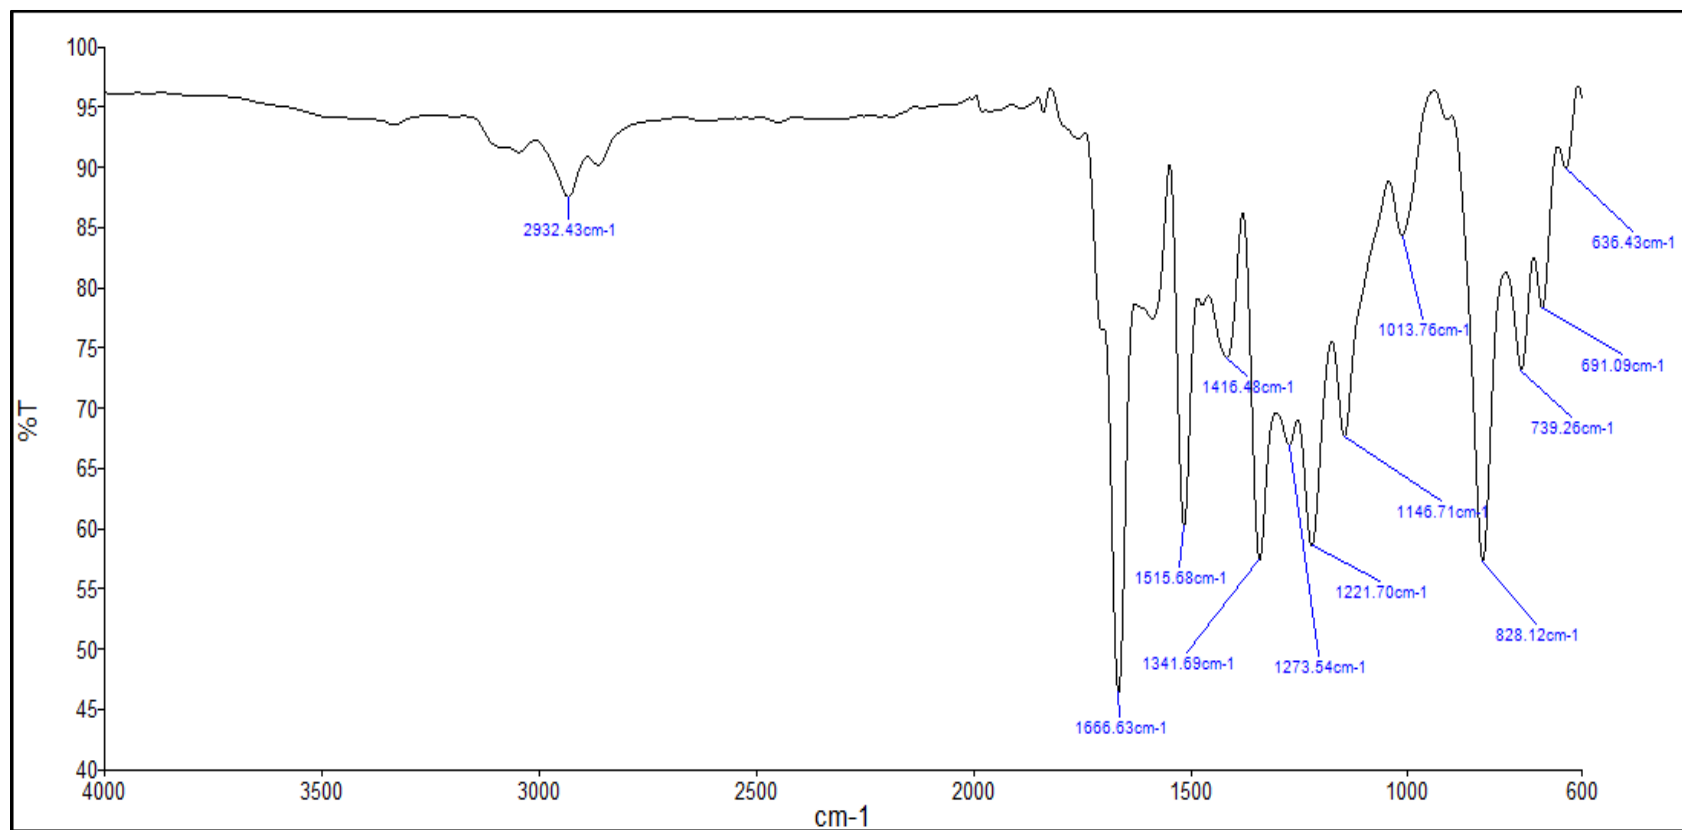

Figure S10. FTIR Spectrum for compound **4d**

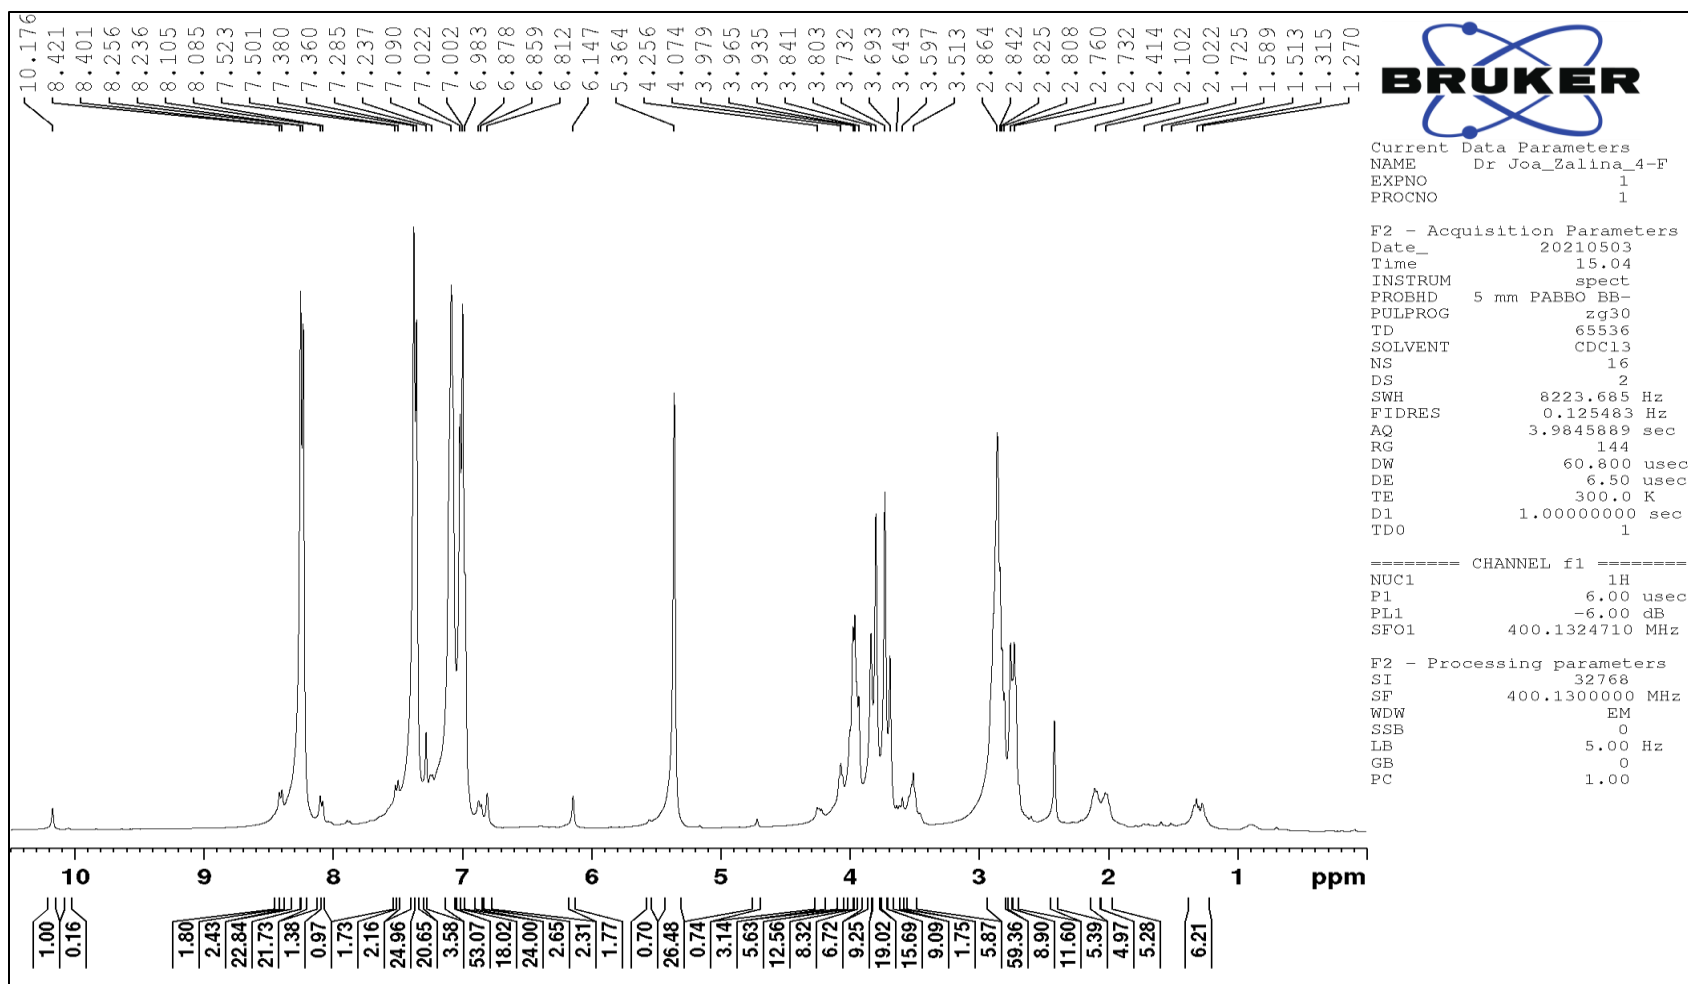

Figure S11. <sup>1</sup>H NMR Spectrum for compound **4d**

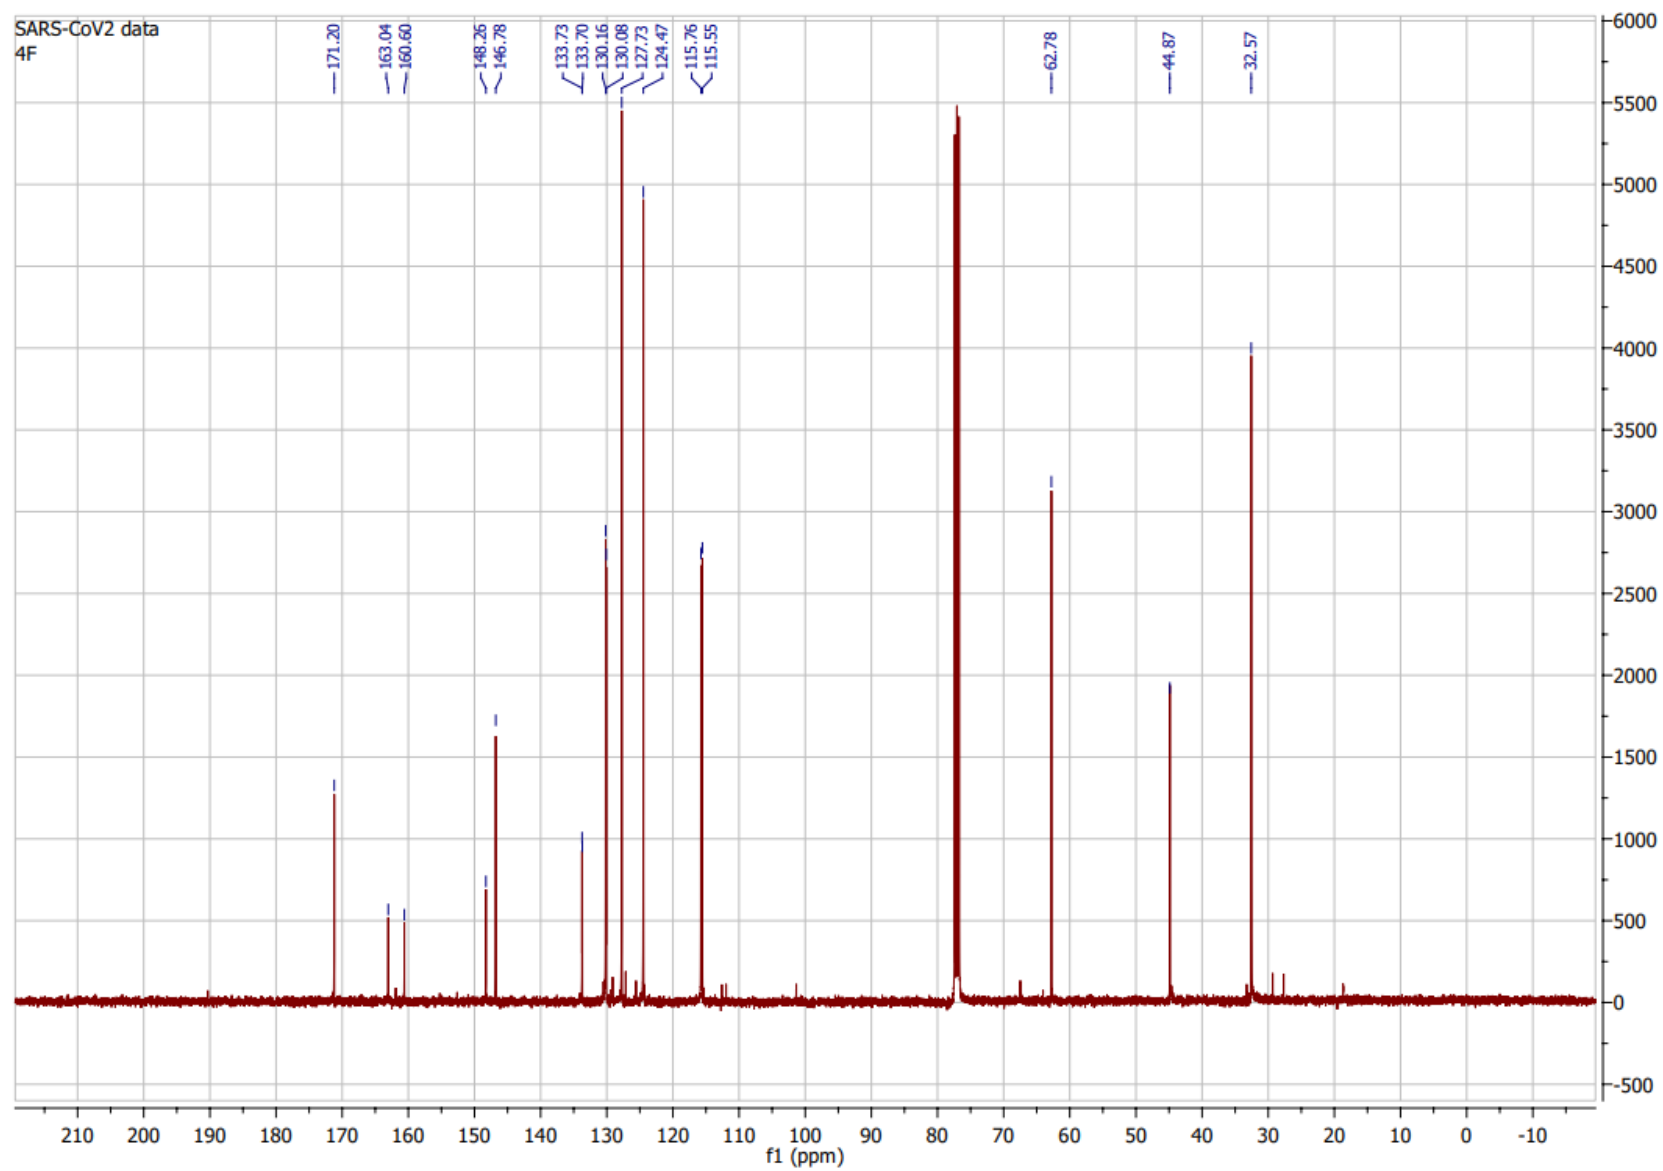

Figure S12.  $^{13}\text{C}$  NMR Spectrum for compound **4d**

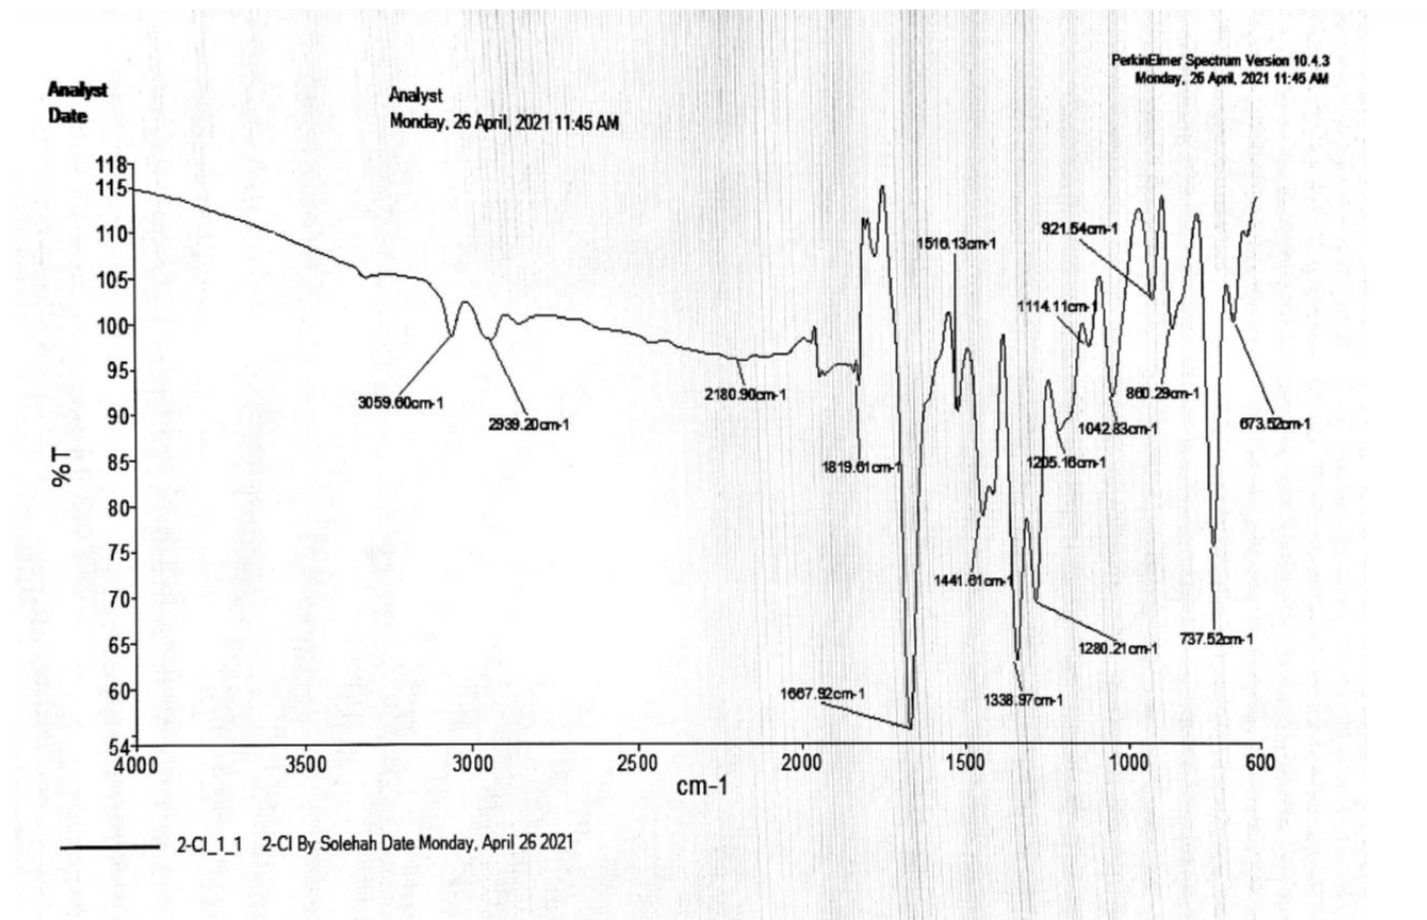

Figure S13. FTIR Spectrum for compound **4e**

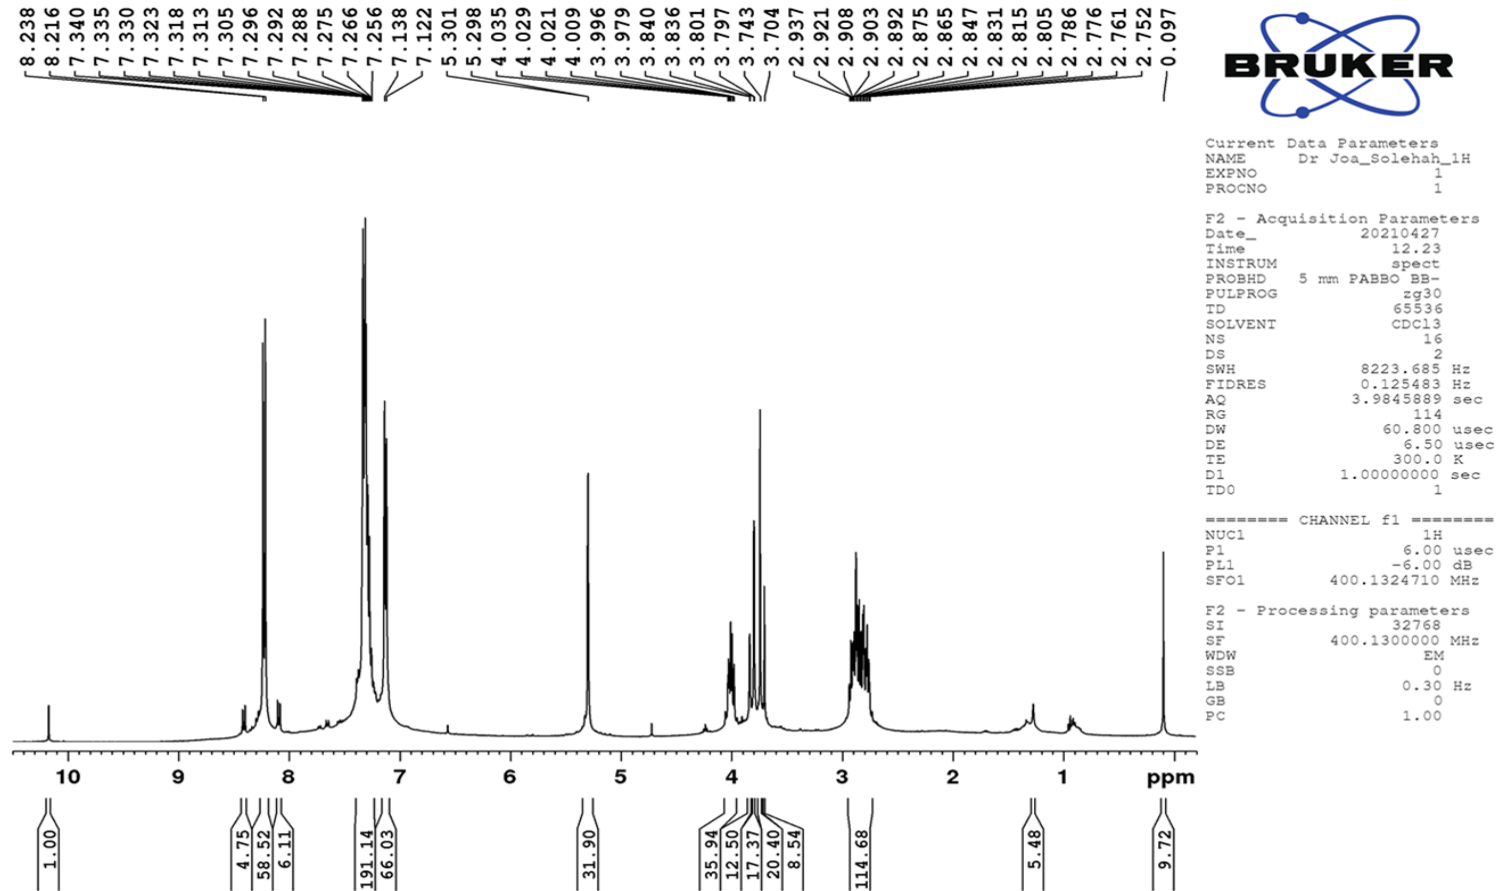

Figure S14.  $^1\text{H}$  NMR Spectrum for compound **4e**



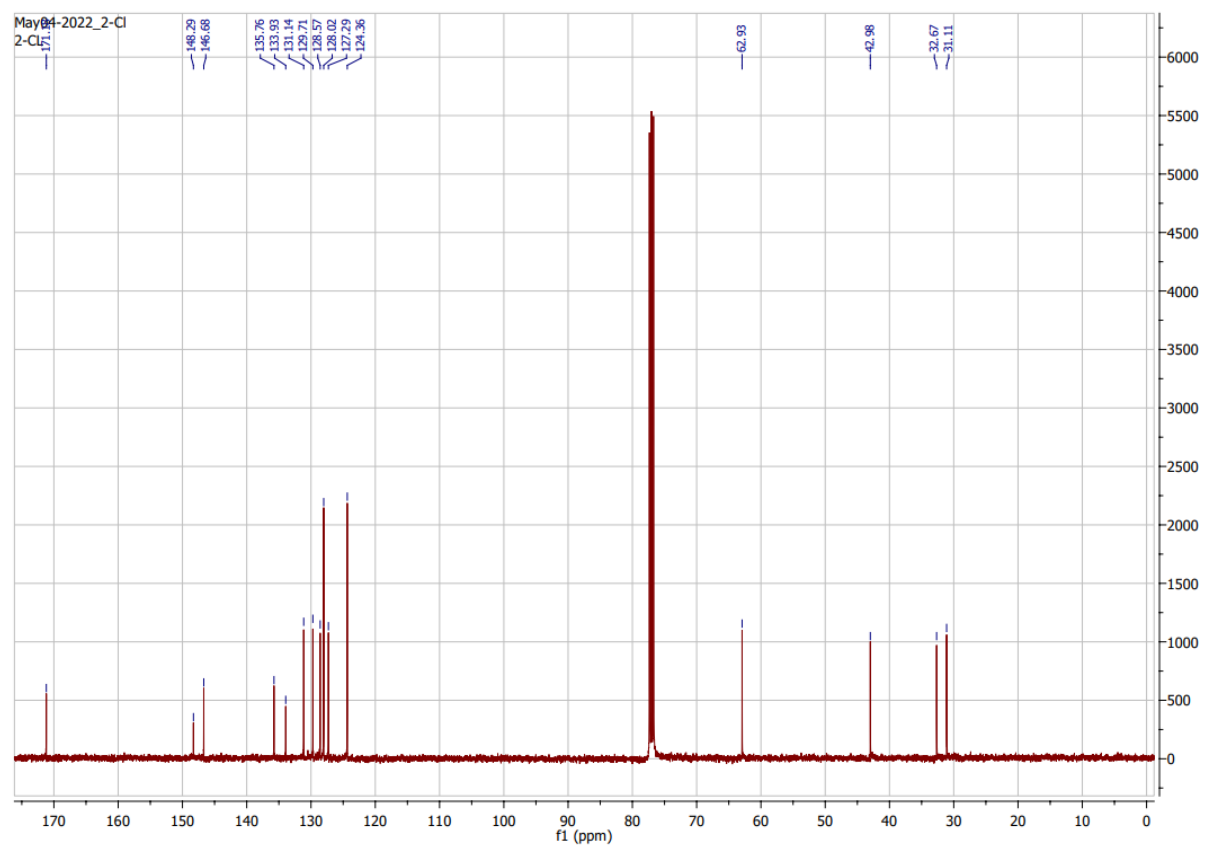

Figure S15.  $^{13}\text{C}$  NMR Spectrum for compound **4e**

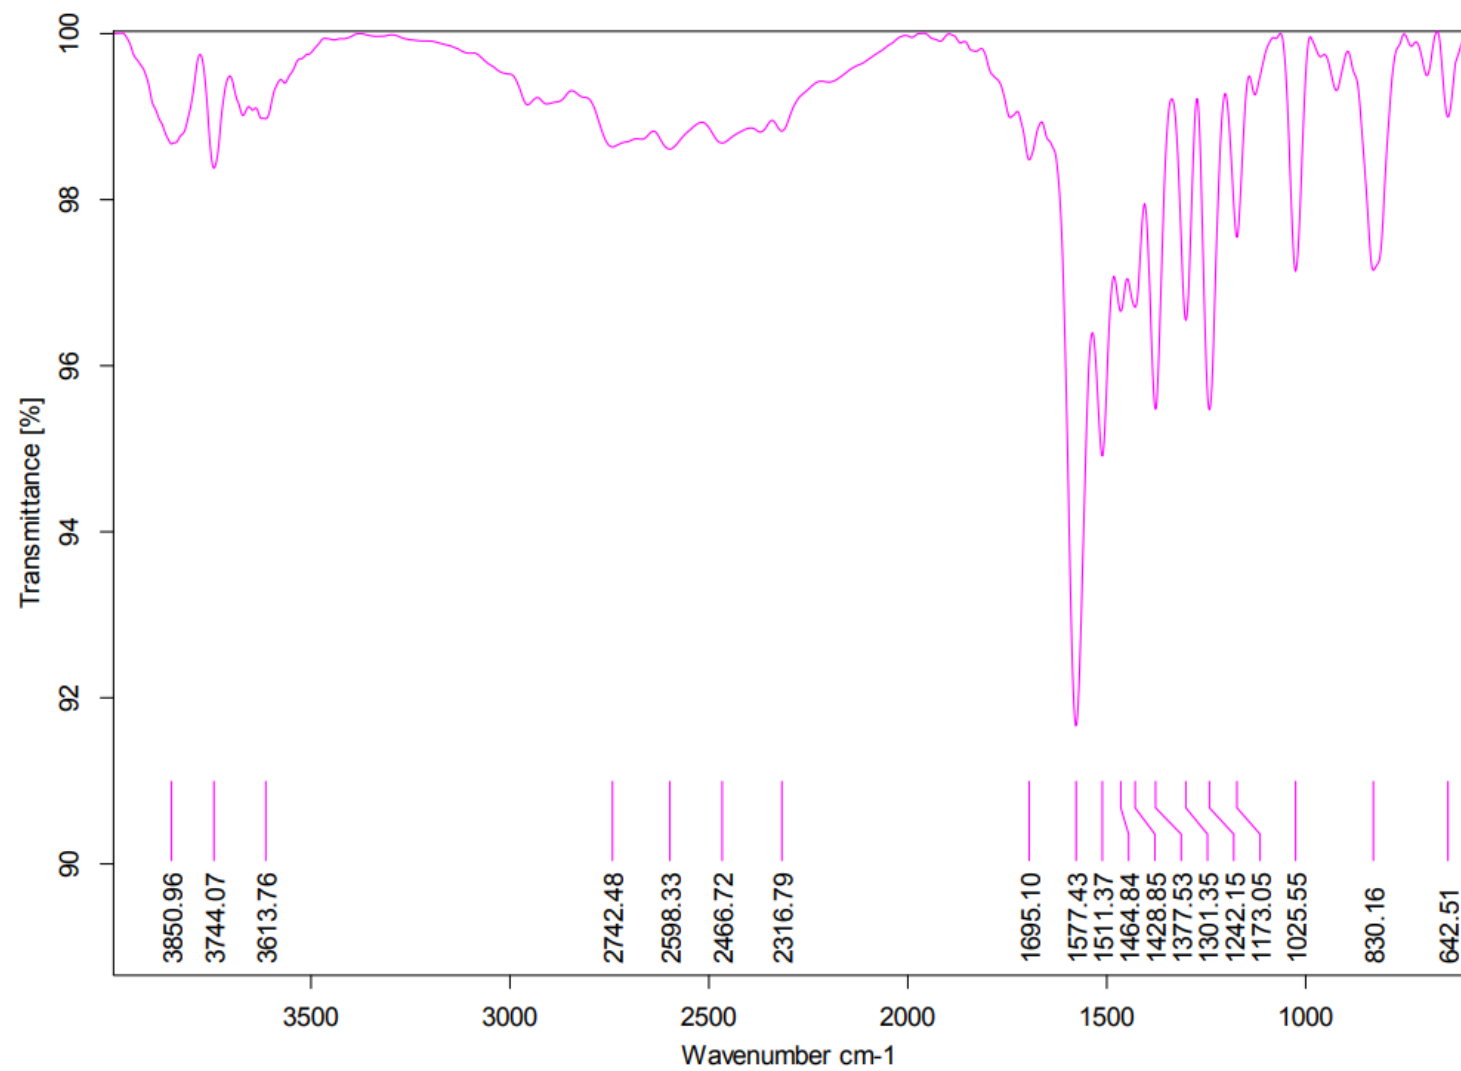

Figure S16. FTIR Spectrum for compound 4f

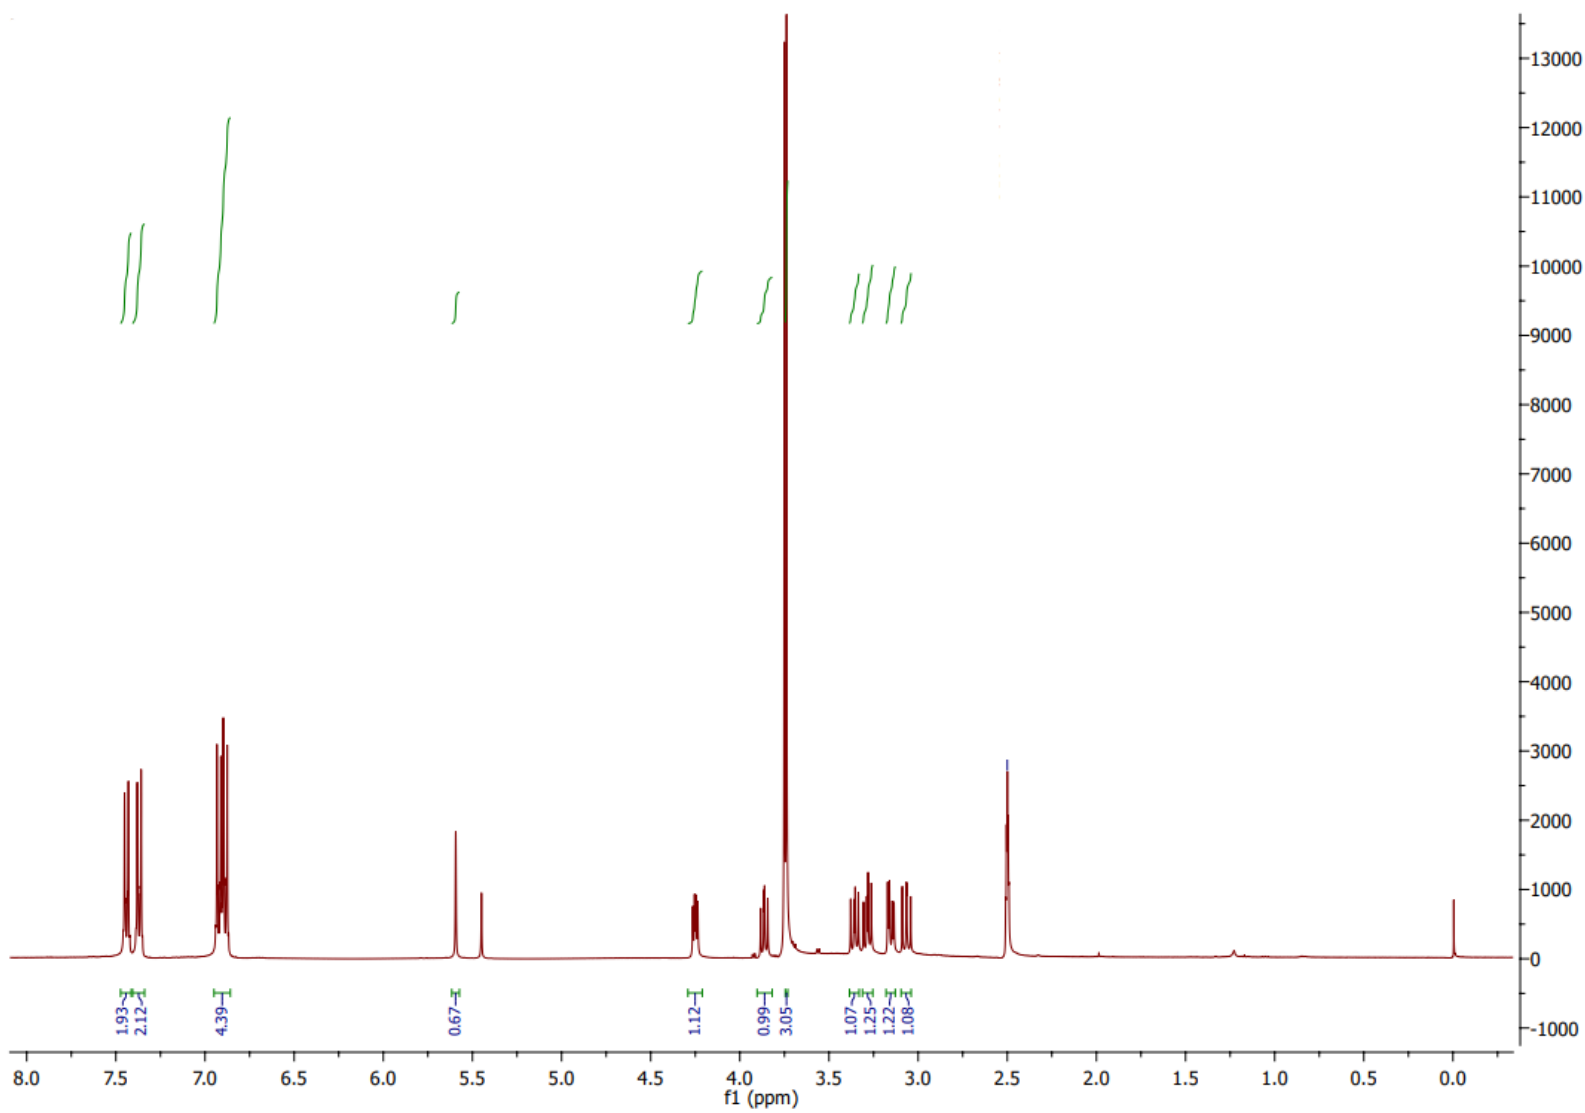

Figure S17.  $^1\text{H}$  NMR Spectrum for compound 4f

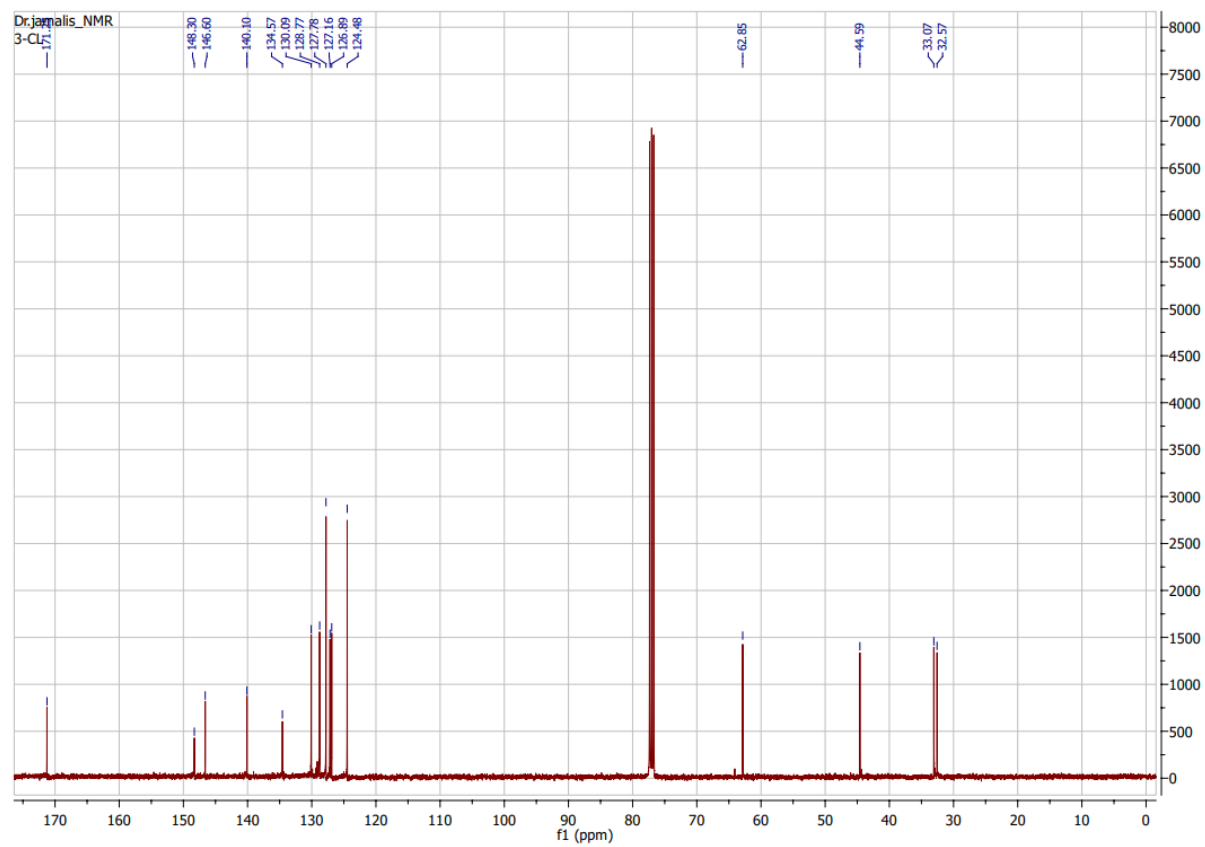

Figure S18.  $^{13}\text{C}$  NMR Spectrum for compound **4f**

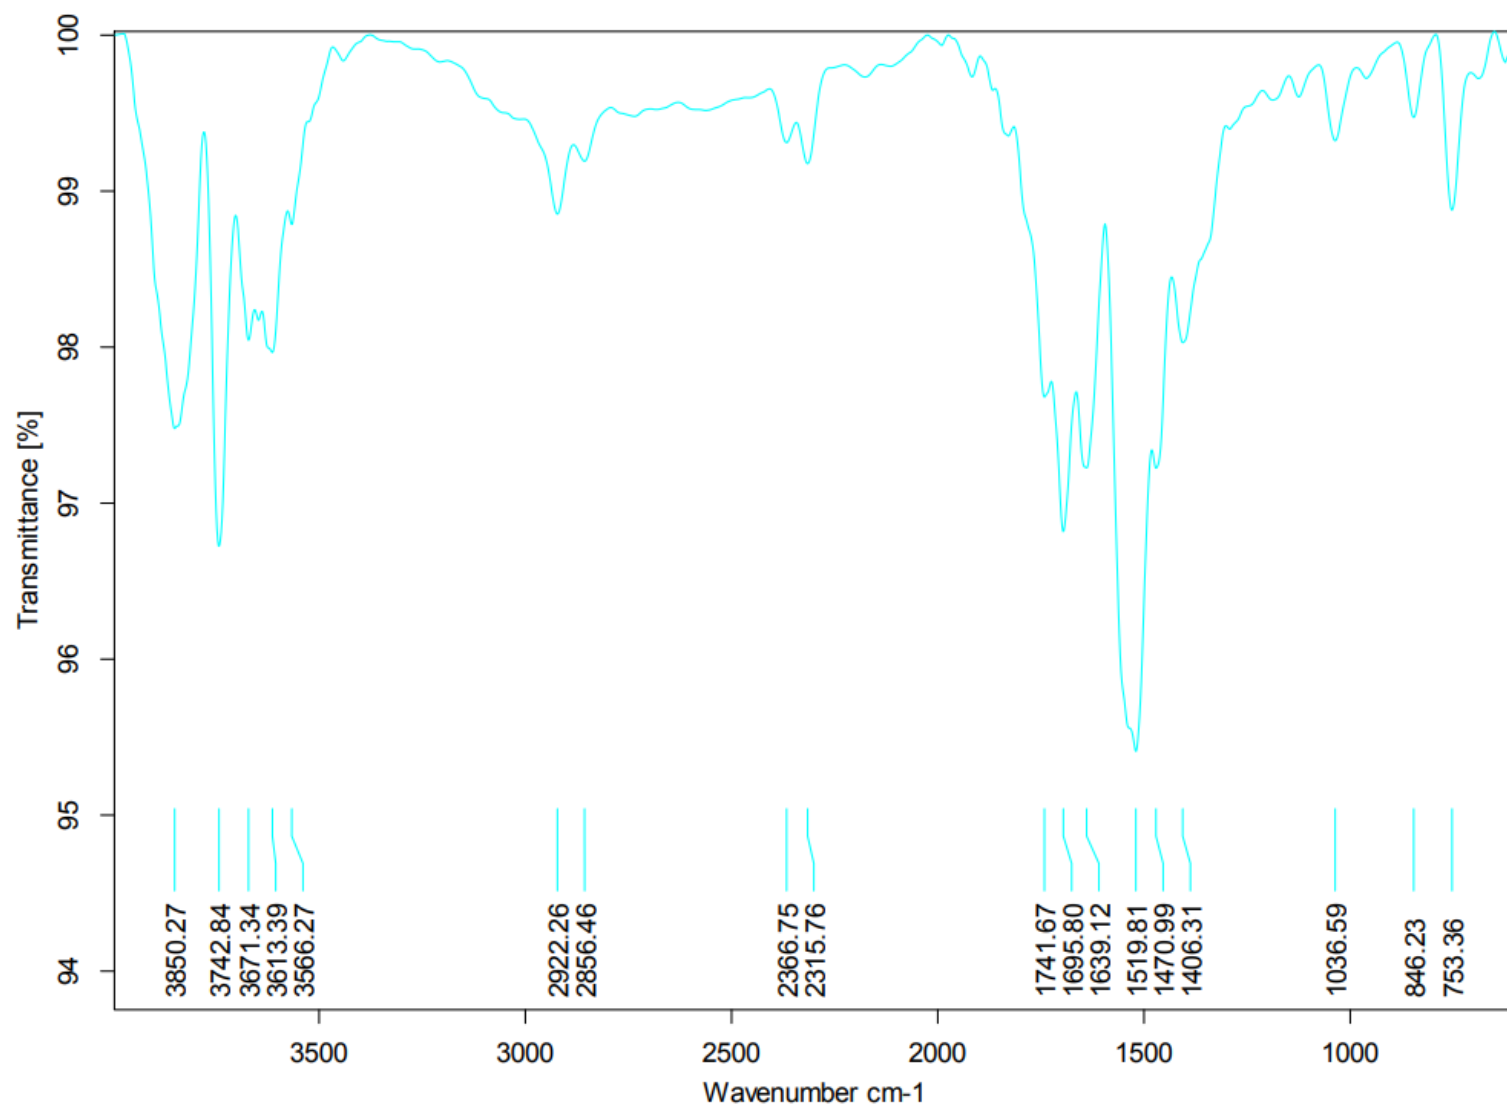

Figure S19. FTIR Spectrum for compound **4g**

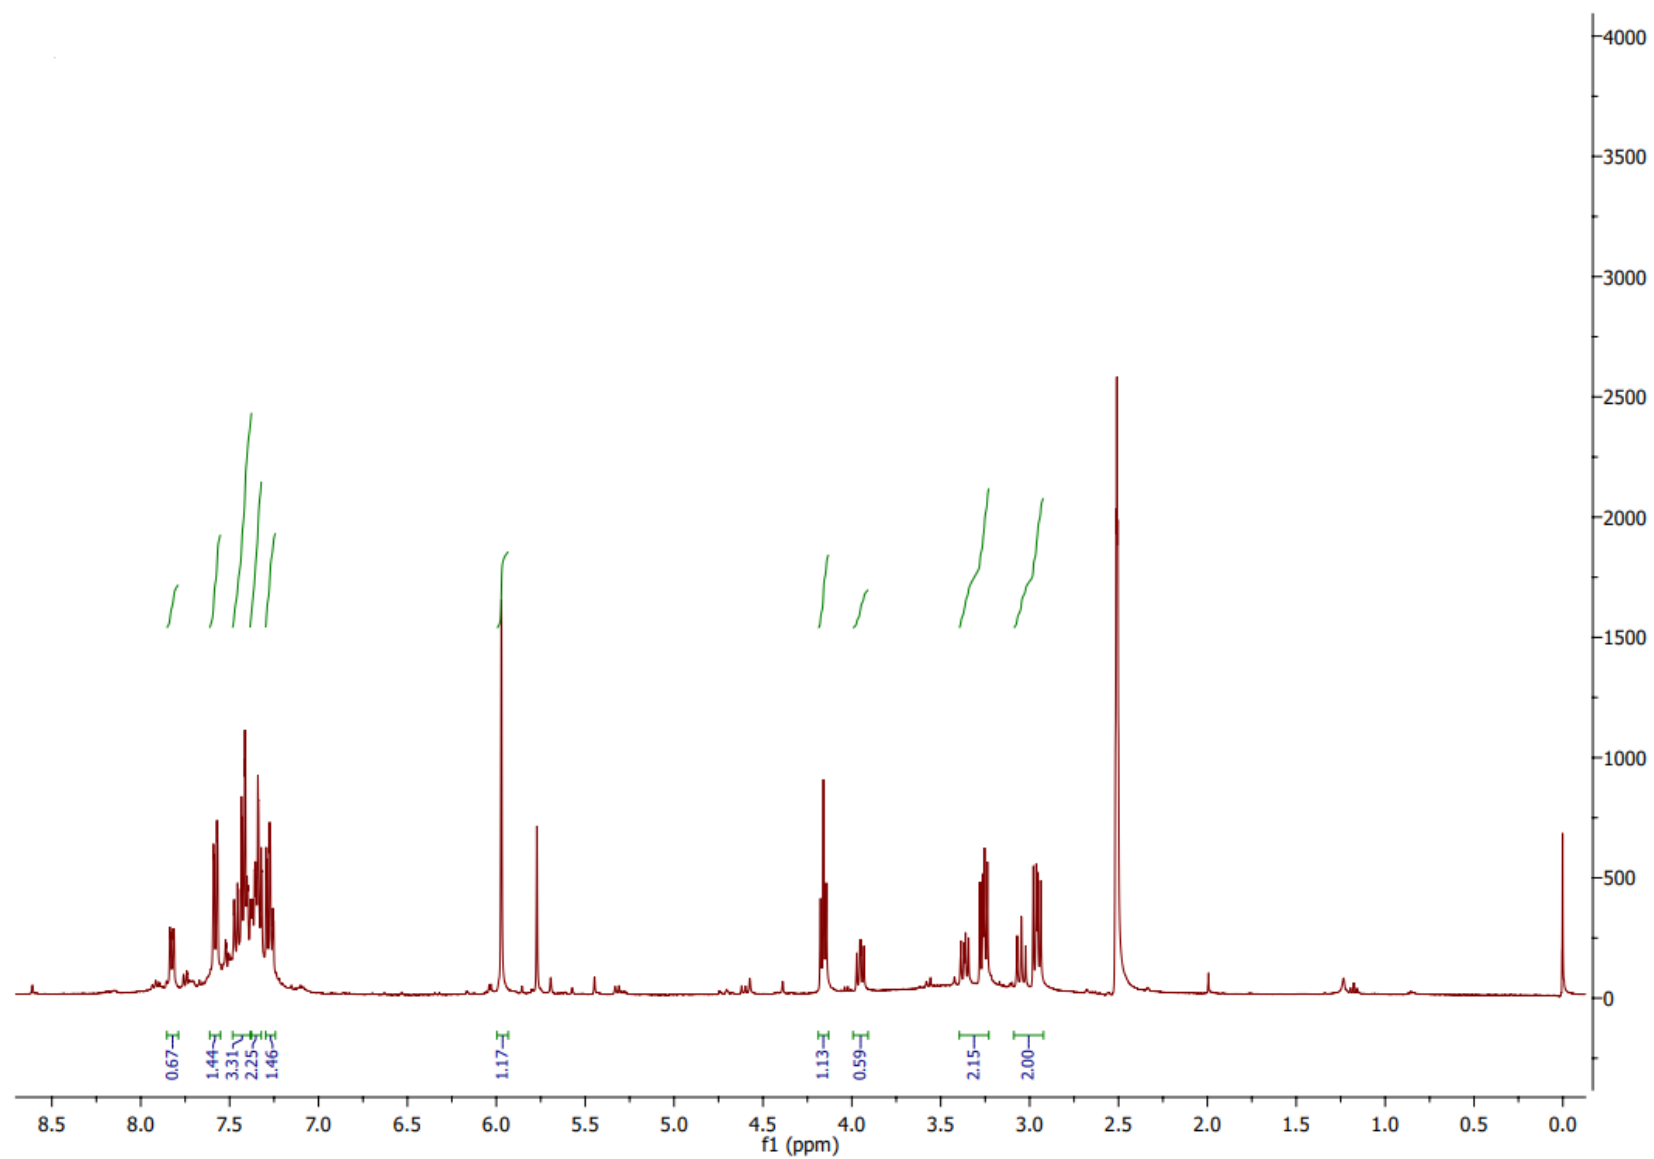

Figure S20.  $^1\text{H}$  NMR Spectrum for compound **4g**

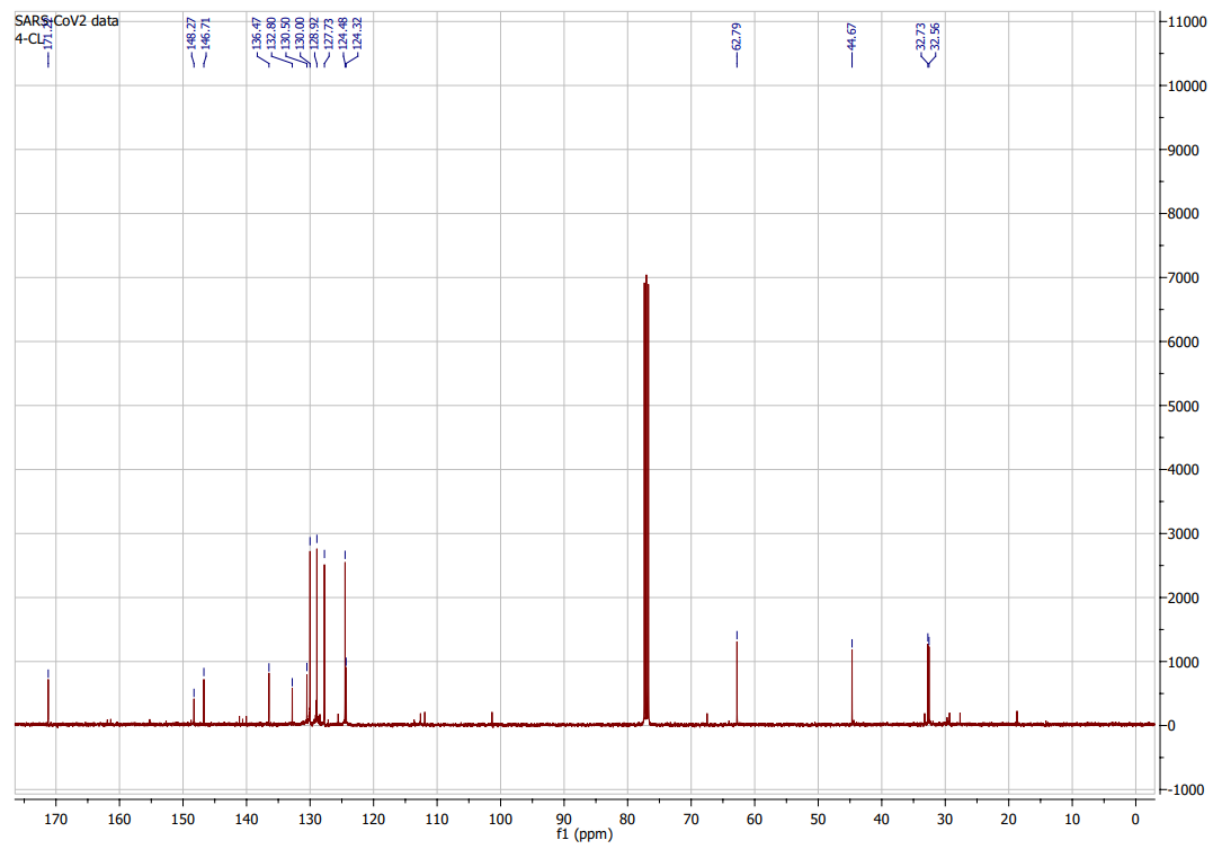

Figure S21.  $^{13}\text{C}$  NMR Spectrum for compound **4g**

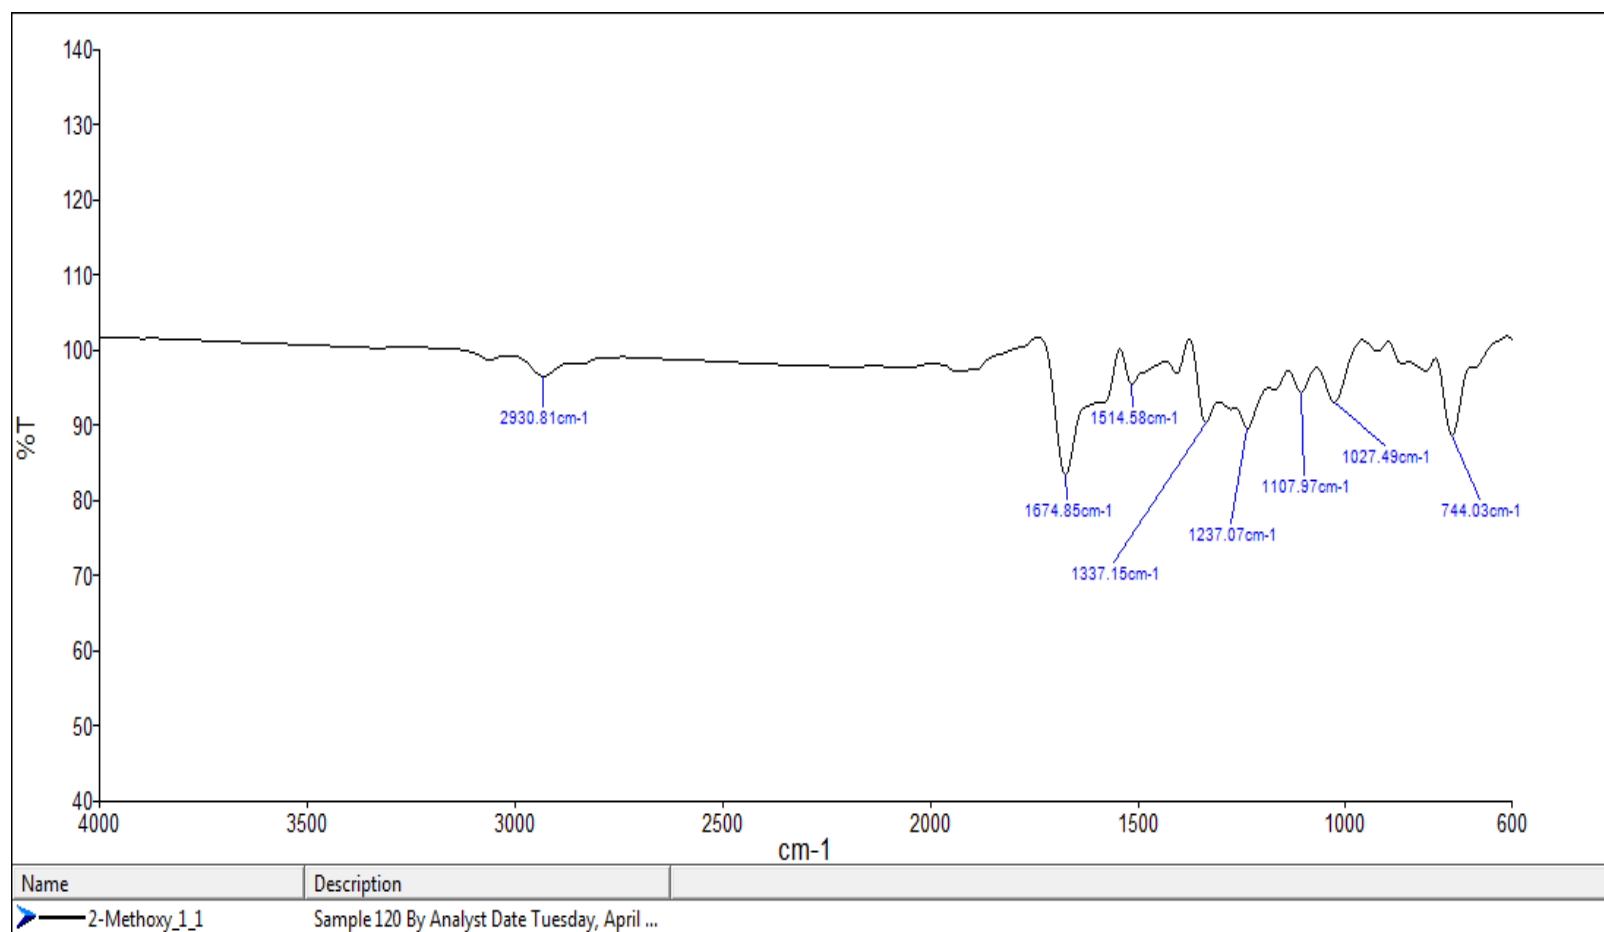

Figure S22. FTIR Spectrum for compound **4h**



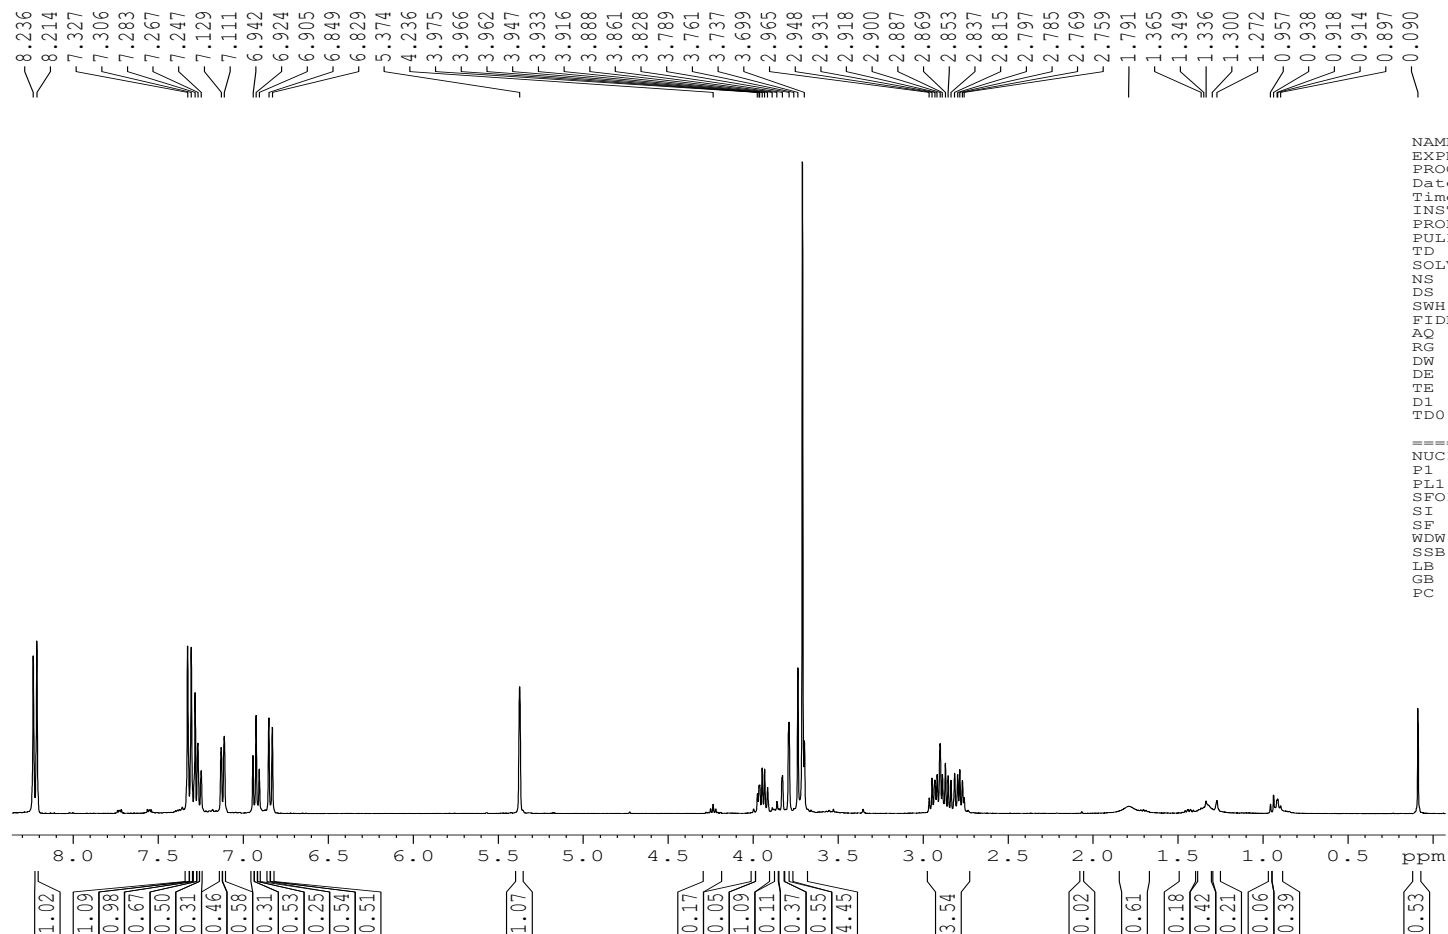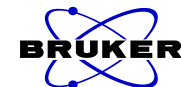

```

NAME      Dr Joa_Solehah_2 Me
EXPNO     1
PROCNO    1
Date_     20210427
Time      14.54
INSTRUM    spect
PROBHD     5 mm PABBO BB-
PULPROG    zg30
TD         65536
SOLVENT    CDCl3
NS         16
DS         2
SWH        8223.685 Hz
FIDRES     0.125483 Hz
AQ         3.9846387 sec
RG         287
DW         60.800 usec
DE         6.50 usec
TE         300.0 K
D1         1.00000000 sec
TD0        1

===== CHANNEL f1 =====
NUC1       1H
P1         6.00 usec
PL1        -6.00 dB
SFO1       400.1324710 MHz
SI         32768
SF         400.1300000 MHz
WDW        EM
SSB        0
LB         0.30 Hz
GB         0
PC         1.00

```

Figure S23.  $^1\text{H}$  NMR Spectrum for compound **4h**

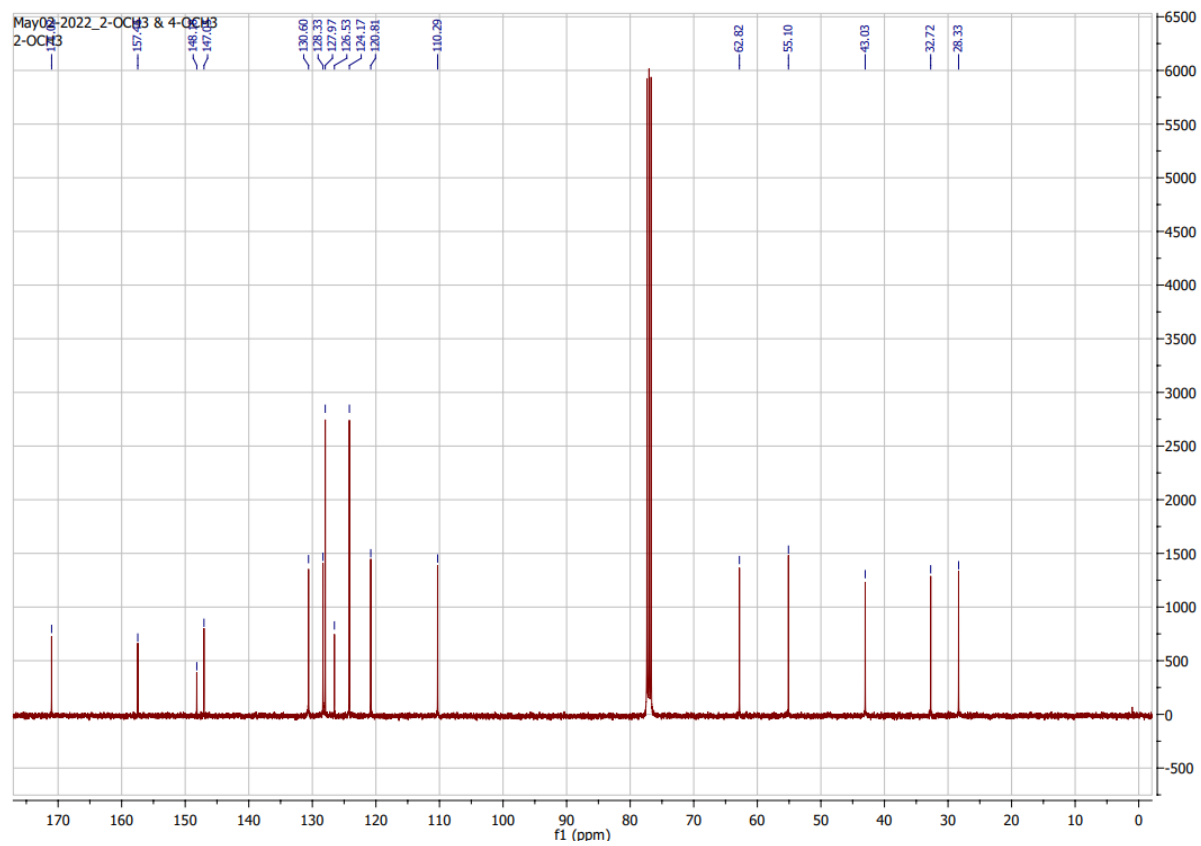

Figure S24.  $^{13}\text{C}$  NMR Spectrum for compound **4h**

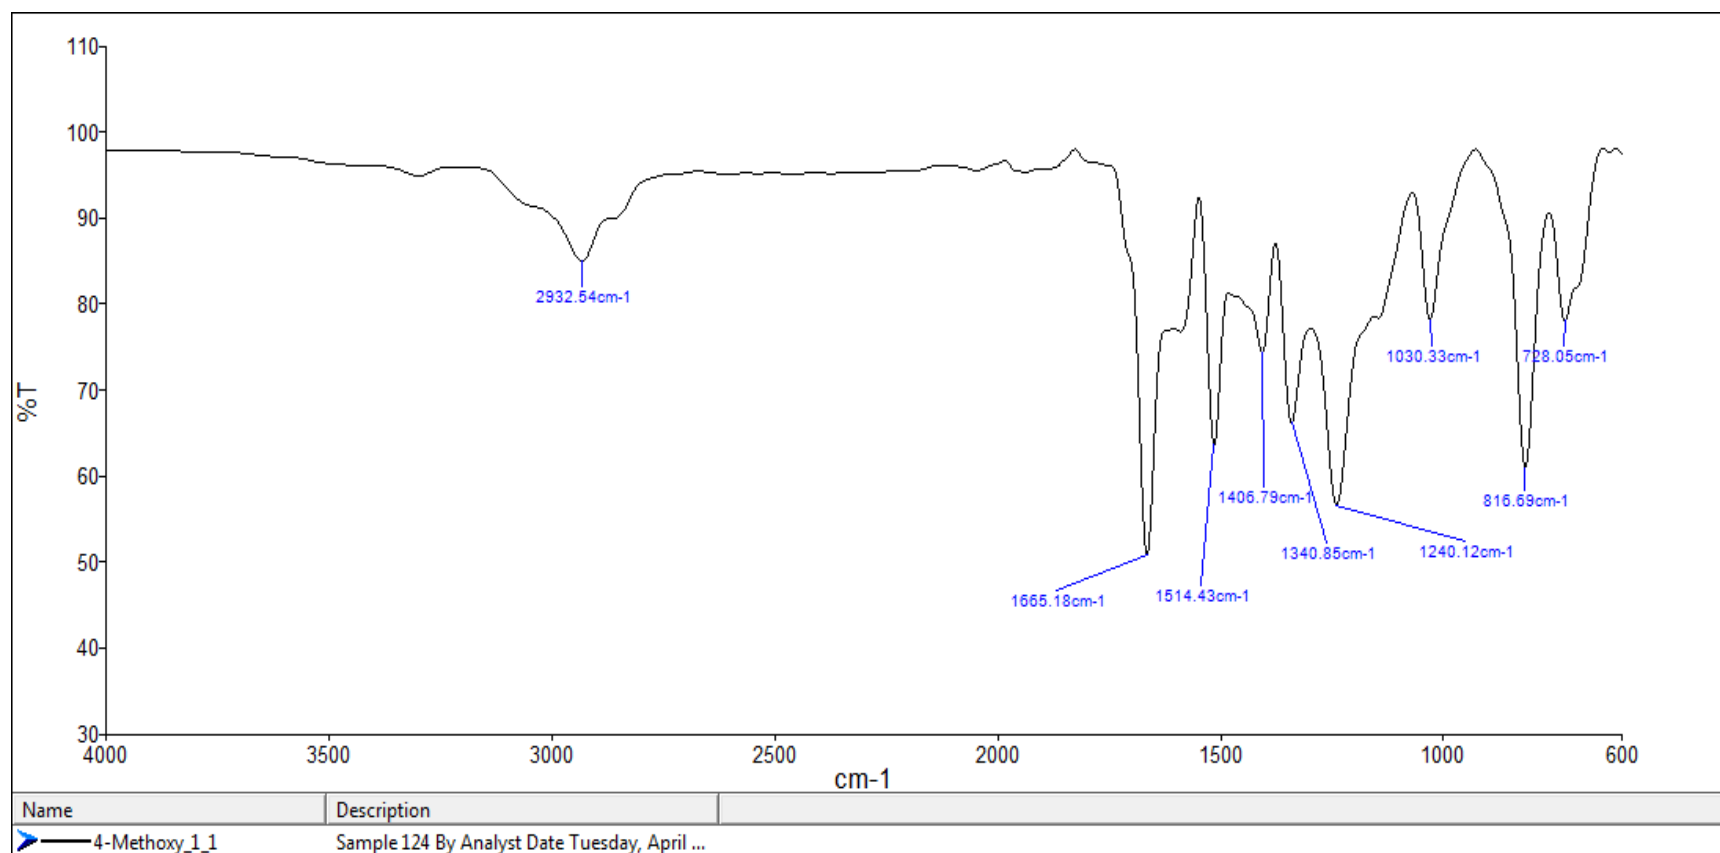

Figure S25. FTIR Spectrum for compound 4i

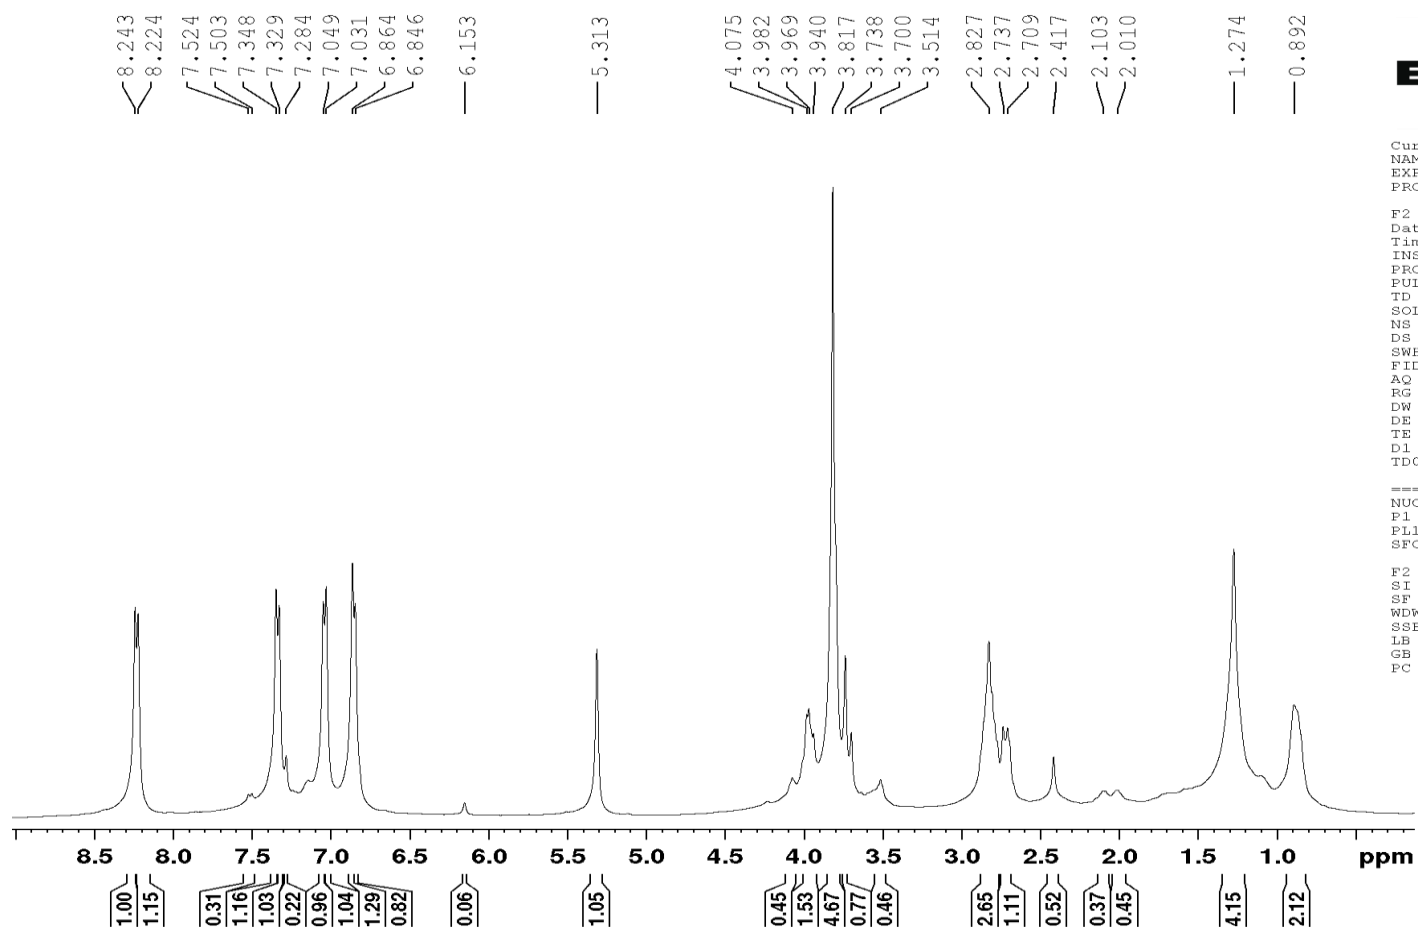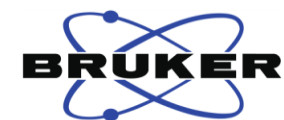

Current Data Parameters  
NAME Dr Joa\_Zalina\_4-Methoxy  
EXPNO 1  
PROCNO 1

F2 - Acquisition Parameters  
Date\_ 20210503  
Time 13.39  
INSTRUM spect  
PROBHD 5 mm PABBO BB-  
PULPROG zg30  
TD 65536  
SOLVENT CDCl3  
NS 16  
DS 2  
SWH 8223.685 Hz  
FIDRES 0.125483 Hz  
AQ 3.9845889 sec  
RG 144  
DW 60.800 usec  
DE 6.50 usec  
TE 300.0 K  
D1 1.00000000 sec  
TDO 1

===== CHANNEL f1 =====  
NUC1 1H  
P1 6.00 usec  
PL1 -6.00 dB  
SFO1 400.1324710 MHz

F2 - Processing parameters  
SI 32768  
SF 400.1300000 MHz  
WDW EM  
SSB 0  
LB 5.00 Hz  
GB 0  
PC 1.00

Figure S26. <sup>1</sup>H NMR Spectrum for compound **4i**

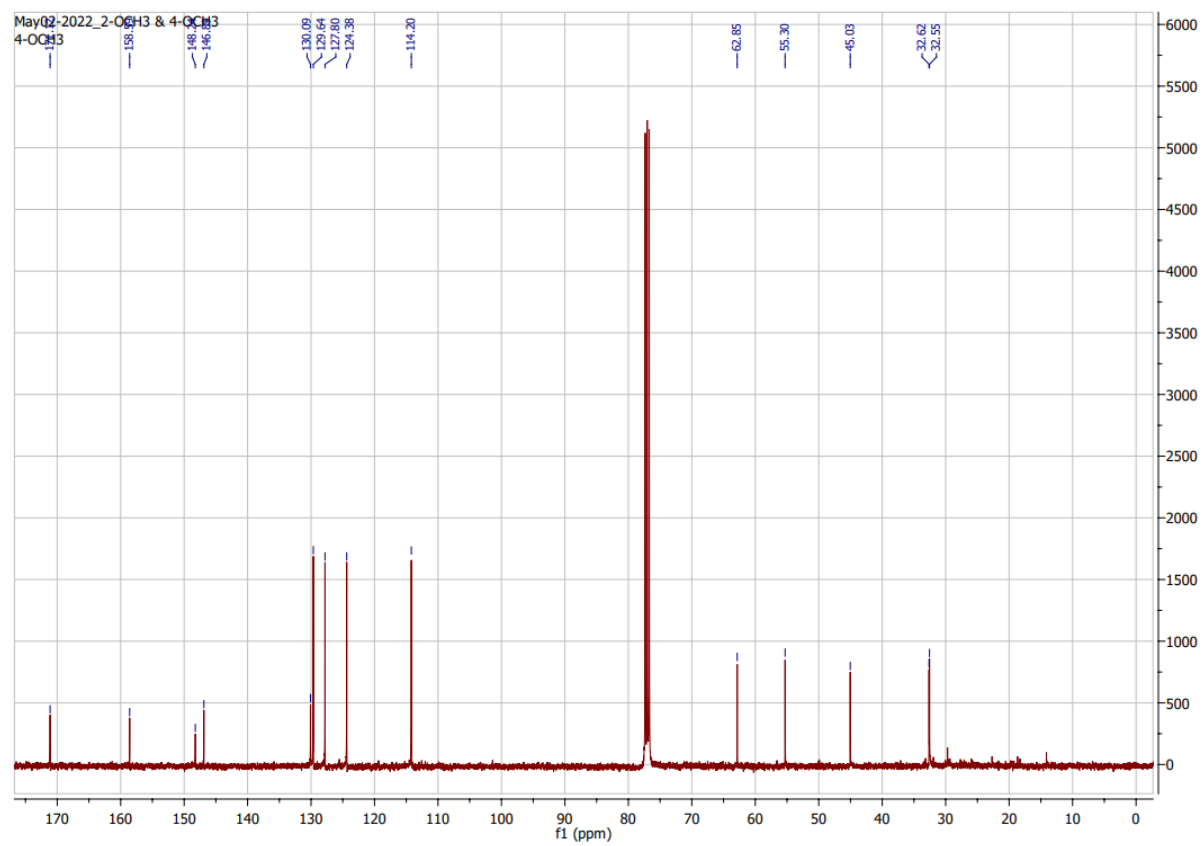

Figure S27  $^{13}\text{C}$  NMR Spectrum for compound **4i**
